# Supplementary material
Source: publisher figshare collection journal article supplement (https://acs.figshare.com/ndownloader/files/4714786)

# Exceptional stereoselectivity in the synthesis of 1,3,4-trisubstituted 4-carboxy $\beta$ -lactam derivatives from amino acids

Paula Pérez-Faginas, Fran O'Reilly, Aisling O'Byrne, Carlos García-Aparicio, Mercedes Martín-Martínez, M. Jesús Pérez de Vega, M. Teresa García-López, Rosario González-Muñiz\*

Instituto de Química Médica (CSIC), Juan de la Cierva, 3, 28006 Madrid, Spain

Email Address (iqmg313@iqm.csic.es)

## Experimental Section

All reagents were of commercial quality. Solvents were dried and purified by standard methods.  $^1\text{H}$  NMR spectra were recorded on 300 MHz in  $\text{CDCl}_3$ , using TMS as internal standard.  $^{13}\text{C}$  NMR spectra were registered on 75 MHz. Electrospray mass spectra (positive mode) were also recorded. Analytical TLC was performed on aluminium sheets with a 0.2 mm layer of silica gel F254. Silica gel 60 (230-400 mesh) was used for column chromatography. Analytical HPLC was performed on a Novapak  $\text{C}_{18}$  ( $3.9 \times 150$  mm, 0.004mm) or on a Deltapak  $\text{C}_{18}$  ( $3.9 \times 150$  mm, 0.004mm) column, with a flow rate of 1mL/min, using a tuneable UV detector set at 214nm. Mixtures of MeCN (solvent A) and 0.05% TFA in  $\text{H}_2\text{O}$  (solvent B) were used in the mobile phase. Chiral HPLC was performed with a Chiralpak IA ( $4.6 \times 150$  mm) column, with a flow rate of 1mL/min, using a tuneable UV detector set at 214nm. The solvent mixtures are specified in each case. *N*-(*p*-Methoxy)benzyl amino acid derivatives **1a**, **1b**, **6-8** were prepared as previously described (Gerona-Navarro, G.; Bonache, M. A.; Herranz, R.; García-López, M. T.; González-Muñiz, R. *J. Org. Chem.* **2001**, 66, 3538).

## Synthesis of *N*-(*p*-methoxy)benzyl-*N*-chloropropionyl amino acid derivatives

**Method A:** A solution of the corresponding *N*-(*p*-methoxy)benzyl amino acid methyl ester derivative (5.78 mmol) in dry THF (28 mL) was treated with propylene oxide (87 mmol) and 2(*R,S*)-chloropropionyl chloride (8.7 mmol). The reaction was then stirred at room temperature for 2 h. The solvent was evaporated to

dryness, and the residue was purified on a silica gel column as specified in each case.

**Method B:** To a solution of the corresponding *N*-(*p*-methoxy)benzyl amino acid methyl ester (6.67mmol) in dry DCM (10mL) was added (*R*)- or (*S*)-chloropropionic acid (13.34 mmol). Then, a solution of PyBrop (13.34mmol) and DIEA (12.01 mmol) in dry DCM (10mL) was added. The reaction was stirred overnight. The solvent was evaporated to dryness and the resulting syrup was extracted with EtOAc and washed with citric acid (10%),  $\text{HNaCO}_3$  (10%) and brine. The organic layer was dried over  $\text{Na}_2\text{SO}_4$  and after evaporation of the solvent the residue was purified on a silica gel column as specified in each case.

## *N*-(*p*-Methoxy)benzyl-*N*-(2*S*)-chloropropionyl-L-Phe-OMe (**3a**).

Eluent: EtOAc:hexane (1:9 to 1:6). Syrup. Yield: 48 % (Method A, from **1a**).  $[\alpha]_{\text{D}}^{25} -93.7$  ( $c = 0.94$ ,  $\text{CHCl}_3$ ). HPLC (Novapak):  $t_{\text{R}} = 11.85$  min (A:B = 40:60).  $^1\text{H}$  NMR (300 MHz,  $\text{CDCl}_3$ ):  $\delta$  main rotamer 1.67 (d, 3H,  $J = 6.5$ , 3-H), 3.20 (dd, 1H,  $J = 14.0$ , 9.1,  $\beta$ -H), 3.35 (dd, 1H,  $J = 14.0$ , 6.2,  $\beta$ -H), 3.61 (s, 3H,  $\text{CH}_3\text{O}$ ), 3.79 (s, 3H,  $\text{CH}_3\text{O}$ ), 3.98 (d, 1H,  $J = 16.1$ ,  $\text{CH}_2\text{-N}$ ), 4.39 (dd, 1H,  $J = 9.1$ , 6.2,  $\alpha$ -H), 4.45 – 4.53 (m, 2H, 2-H and  $\text{CH}_2\text{-N}$ ) 6.80 (d, 2H,  $J = 8.7$ ,  $\text{C}_6\text{H}_4$ ), 7.00 (d, 2H,  $J = 8.6$ ,  $\text{C}_6\text{H}_4$ ), 7.08–7.11 (m, 2H,  $\text{C}_6\text{H}_5$ ), 7.20–7.27 (m, 3H  $\text{C}_6\text{H}_5$ ).  $^{13}\text{C}$  NMR (75 MHz,  $\text{CDCl}_3$ ):  $\delta$  20.96 (3-C), 34.92 ( $\beta$ -C), 49.75 (2-C), 51.23 (N- $\text{CH}_2$ ), 52.03 (OMe), 55.18 (OMe), 60.19 ( $\alpha$ -C). 113.98, 126.66, 127.07, 128.47, 128.73, 129.21, 137.58, and 159.20 (Ar), 169.40, and 170.21 (CO). EM (ES positive mode): 390.1 ( $\text{M}+1$ ) $^+$ , 412.1

(M+Na)<sup>+</sup>. Anal Calc. for C<sub>21</sub>H<sub>24</sub>ClNO<sub>4</sub>: C 64.69, H 6.20, N 3.59. Found: C 64.53, H 6.45, N 3.31.

***N*-(*p*-Methoxybenzyl)- *N*-(2*R*)-Chloropropionyl-L-Phe-OMe (3b).**

Eluent: EtOAc:hexane (1:9 to 1:6). Syrup. Yield: 42% (Method A, from **1a**). [α]<sub>D</sub> = +118.3 (c = 0.35, CHCl<sub>3</sub>). HPLC (Novapak): t<sub>R</sub> = 13.26 min (A:B = 40:60). <sup>1</sup>H NMR (300 MHz, CDCl<sub>3</sub>): main rotamer δ 1.61 (d, 3H, *J* = 6.5, 3-H), 3.30 (dd, 1H, *J* = 13.9, 9.9 β-H), 3.38 (dd, 1H, *J* = 13.9, 5.1, β-H), 3.56 (d, 1H, *J* = 16.3, CH<sub>2</sub>-N), 3.71 (s, 3H, CH<sub>3</sub>O), 3.78 (s, 3H, CH<sub>3</sub>O), 4.07 (dd, 1H, *J* = 9.9, 5.1, α-H), 4.42 (q, 1H, *J* = 6.5, 2-H), 4.52 (d, 1H, *J* = 16.3, CH<sub>2</sub>-N) 6.82 (d, 2H, *J* = 8.7, C<sub>6</sub>H<sub>4</sub>), 7.05 (d, 2H, *J* = 8.7, C<sub>6</sub>H<sub>4</sub>), 7.19-7.27 (m, 5H C<sub>6</sub>H<sub>5</sub>). <sup>13</sup>C NMR (75 MHz, CDCl<sub>3</sub>): δ 20.81 (3-C), 34.78 (β-C), 49.69 (2-C), 52.25 (N-CH<sub>2</sub>), 52.43 (OMe), 55.24 (OMe), 62.40 (α-C), 114.08, 126.74, 127.46, 128.56, 128.91, 129.57, 137.78, and 159.21 (12C Ar), 169.30 and 170.15 (CO). EM (ES positive mode): 390.1 (M+1)<sup>+</sup>, 412.1 (M+Na)<sup>+</sup>. Anal Calc. for C<sub>21</sub>H<sub>24</sub>ClNO<sub>4</sub>: C 64.69, H 6.20, N 3.59. Found: C 64.62, H 6.38, N 3.48.

***N*-(*p*-Methoxybenzyl)- *N*-(2*S*)-Chloropropionyl-D-Phe-OMe (3c).**

Eluent: EtOAc:hexane (1:9 to 1:6). Syrup. Yield: 40% (Method A, from **1b**). [α]<sub>D</sub> = -120.2 (c = 1.04, CHCl<sub>3</sub>). HPLC (Novapak): t<sub>R</sub> = 13.20 min (A:B = 40:60). Anal Calc. for C<sub>21</sub>H<sub>24</sub>ClNO<sub>4</sub>: C 64.69, H 6.20, N 3.59. Found: C 64.51, H 6.11, N 3.33.

***N*-(*p*-Methoxybenzyl)- *N*-(2*R*)-chloropropionyl-D-Phe-OMe (3d).**

Eluent: EtOAc:hexane (1:9 to 1:6). Syrup. Yield: 52 % (Method A, from **1b**). [α]<sub>D</sub> = +98.5 (c = 1, CHCl<sub>3</sub>). HPLC (Novapak): t<sub>R</sub> = 11.82 min (A:B = 40:60). Anal Calc. for C<sub>21</sub>H<sub>24</sub>ClNO<sub>4</sub>: C 64.69, H 6.20, N 3.59. Found: C 64.72, H 6.13, N 3.29.

***N*-(*p*-Methoxy)benzyl-*N*-(2*S*)-chloropropionyl-L-Ala-OMe (9a)**

Eluent: Hexane: EtOAc (9:1 to 2:1). Syrup. Yield: 53%. (Method B, from **6**). [α]<sub>D</sub> = -46.2 (c = 0.52, CHCl<sub>3</sub>). HPLC (Novapak): t<sub>R</sub> = 12.03 min (A:B = 35:65). <sup>1</sup>H NMR (300MHz, CDCl<sub>3</sub>): δ 1.38 (d, 3H, *J* = 6.9, β-H), 1.66 (d, 3H, *J*=6.6, 3-H), 3.65 (s, 3H, OMe), 3.81 (s, 3H, OMe), 4.43-4.58 (m, 3H, CH<sub>2</sub>-N α-H, 2-H), 4.72 (d, 1H, *J* = 17.1, CH<sub>2</sub>-N), 6.90 (d, 2H, *J* = 8.7, C<sub>6</sub>H<sub>4</sub>), 7.21 (d, 2H, *J* = 8.7, C<sub>6</sub>H<sub>4</sub>). <sup>13</sup>C NMR (75 MHz, CDCl<sub>3</sub>): δ 14.60 (3-C), 21.00 (β-C), 50.60 (CH<sub>2</sub>-N), 50.35 (2-C), 52.24 (α-C), 54.91 (OMe), 55.26 (OMe), 114.35, 127.89, 128.06, and 159.25 (Ar), 169.63, and 171.57 (CO). EM (ES positive mode): 314.1 (M+1)<sup>+</sup>, 336.0(M+Na)<sup>+</sup>. Anal Calc. for C<sub>15</sub>H<sub>20</sub>ClNO<sub>4</sub>: C 57.42, H 6.42, N 4.46. Found: C 57.65, H 6.30, N 4.09.

***N*-(*p*-methoxy)benzyl-*N*-(2*R*)-chloropropionyl-L-Ala-OMe (9b)**

Eluent: Hexane: EtOAc (20:1). Syrup. Yield: 50% (Method B, from **6**). [α]<sub>D</sub> = +14.5 (c = 0.45, CHCl<sub>3</sub>). HPLC (Novapak): t<sub>R</sub> = 14.48 min (A:B = 35:65). <sup>1</sup>H NMR (300MHz, CDCl<sub>3</sub>): δ 1.39 (d, 3H, *J* = 6.9, β-H), 1.61 (d, 3H, *J* = 6.6, 3-H), 3.72 (s, 3H, OMe), 3.81 (s, 3H, OMe), 4.41-4.68 (m, 3H, CH<sub>2</sub>-N, α-H, 2-H), 4.83 (d, 1H, *J* = 17.3, CH<sub>2</sub>-N), 6.90 (d, 2H, *J* = 8.6, C<sub>6</sub>H<sub>4</sub>), 7.20 (d, 2H, *J* = 8.6, C<sub>6</sub>H<sub>4</sub>). <sup>13</sup>C NMR (75 MHz, CDCl<sub>3</sub>): δ 14.06 (3-C), 20.73 (β-C), 49.95 (2-C), 50.05 (CH<sub>2</sub>-N), 52.06 (α-C), 54.77 (OMe), 55.08 (OMe), 114.17, 127.26, 128.41, and 159.06 (Ar), 169.50, and 171.39 (CO). EM (ES positive mode): 314.0 (M+1)<sup>+</sup>, 336.0 (M+Na)<sup>+</sup>. Anal Calc. for C<sub>15</sub>H<sub>20</sub>ClNO<sub>4</sub>: C 57.42, H 6.42, N 4.46. Found: C 57.34, H 6.19, N 4.37.

**Table 1.** Evaluation of different coupling agents and bases for the preparation of compound **9a** from Pmb-L-Ala-OMe (**6**) and 2*S*-chloropropionic acid (method B).

| Coupling agent | Base         | diastereoisomeric excess (%) <sup>a</sup> | conversion <sup>b</sup> (%) |
|----------------|--------------|-------------------------------------------|-----------------------------|
| BOP            | TEA          | 95                                        | 34                          |
|                | DIEA         | 97                                        | 45                          |
|                | Collidin e   | 97                                        | 25                          |
|                | 2,6-Lutidine | 98                                        | 22                          |
|                | DIEA         | 94                                        | 76                          |
| PyBroP         | Collidin e   | 95                                        | 58                          |
|                | 2,6-Lutidine | 95                                        | 46                          |
| BroP           |              | 93                                        | 48                          |
| HATU           |              | 96                                        | 31                          |
| PyAOP          |              | 95                                        | 27                          |
| BTC            | DIEA         | 67                                        | 8                           |
| TFFH           |              | 94                                        | 46                          |
| PyBOP/HOAt     |              | 87                                        | 11                          |

<sup>a</sup> The **9a:9b** ratio was measured by HPLC (A:B = 35:65).

<sup>b</sup> From HPLC crude mixtures after 48 h of reaction.

***N*-(*p*-Methoxy)benzyl-*N*-(2*S*)-chloropropionyl-L-Lys(Boc)-OMe (10a)**

Eluent: EtOAc:hexane (1:9 to 1:4). Syrup. Yield: 70% (Method B, from **7**). [α]<sub>D</sub> = -17.62 (c = 0.61, CHCl<sub>3</sub>). HPLC (Deltapak): t<sub>R</sub> = 16.40 min, (A:B = 45:55). Chiral HPLC: t<sub>R</sub> = 10.75 min (EtOH:hexane = 7:93). <sup>1</sup>H NMR (300 MHz, CDCl<sub>3</sub>): 1.31 (m, 2H, γ-H), 1.38 (m, 2H, δ-H), 1.44 (s, 9H, CH<sub>3</sub> <sup>t</sup>Bu), 1.63 (d, 3H, *J* = 6.5, 3-H), 1.81 (m, 1H, β-H), 1.99 (m, 1H, β-H), 3.06 (m, 2H, ε-H), 3.52 (s, 3H, OMe), 3.80 (s, 3H, OMe), 4.48 (m, 2H, 2-H and ε-NH), 4.49 (d, *J*=16.8, 1H, CH<sub>2</sub>-N), 4.71 (d, 1H, *J*=16.8, CH<sub>2</sub>-N), 4.86 (dd, *J*=8.5, 6.5, 1H, α-H), 6.88 (d, 2H, *J*=8.5, C<sub>6</sub>H<sub>4</sub>), 7.14 (d, 2H, *J*=8.5, C<sub>6</sub>H<sub>4</sub>). <sup>13</sup>C NMR

(75 MHz, CDCl<sub>3</sub>): 20.8 (CH<sub>3</sub>), 23.1 (γ-C), 28.4 (CH<sub>3</sub><sup>1</sup>Bu), 29.0 (β-C), 29.5 (δ-C), 40.2 (ε-C), 48.7 (CH<sub>2</sub>-N), 50.1 (2-C), 51.9 (OMe), 55.3 (OMe), 57.2 (α-C), 79.0 (C<sup>1</sup>Bu), 114.2, 127.8, 128.1, 155.9 (Ar); 159.2, 170.4, and 171.1 (CO). MS (ES positive mode): 493.1 (M+Na)<sup>+</sup>. Anal Calc. for C<sub>23</sub>H<sub>35</sub>ClN<sub>2</sub>O<sub>6</sub>: C 58.65, H 7.49, N 5.95. Found: C 58.57, H 7.52, N 5.82.

***N*-(*p*-methoxy)benzyl-*N*-(2*R*)-chloropropionyl-L-Lys(Boc)-OMe (10b)**

Eluent: EtOAc:hexane (1:9 to 1:4). Syrup. Yield: 52% (Method B, from **7**). [α]<sub>D</sub> = -34.33 (c = 0.92, CHCl<sub>3</sub>). HPLC (Deltapak): t<sub>R</sub> = 18.56 min, (A:B = 45:55). Chiral HPLC: t<sub>R</sub> = 8.37 min (EtOH:hexane = 7:93). <sup>1</sup>H NMR (300 MHz, CDCl<sub>3</sub>): 1.33 (m, 2H, γ-H), 1.39 (m, 2H, δ-H), 1.44 (s, 9H, CH<sub>3</sub><sup>1</sup>Bu), 1.63 (d, 3H, J=6.6, 3-H), 1.85 (m, 1H, β-H), 2.03 (m, 1H, β-H), 3.04 (m, 2H, ε-H), 3.69 (s, 3H, OMe), 3.82 (s, 3H, OMe), 4.28 (dd, 1H, J=7.8, 6.6, α-H), 4.44 (d, 1H, J=17.1, CH<sub>2</sub>-N), 4.52 (m, 2H, 2-H and ε-NH), 4.83 (d, 1H, J=17.1, CH<sub>2</sub>-N), 6.90 (d, 2H, J=8.8, C<sub>6</sub>H<sub>4</sub>), 7.23 (d, 2H, J=8.8, C<sub>6</sub>H<sub>4</sub>). <sup>13</sup>C NMR (75 MHz, CDCl<sub>3</sub>): 20.7 (CH<sub>3</sub>), 23.9 (γ-C), 28.4 (CH<sub>3</sub><sup>1</sup>Bu), 28.6 (β-C), 29.7 (δ-C), 40.1 (ε-C), 49.9 (2-C), 51.1 (CH<sub>2</sub>-N), 52.2 (OMe), 55.3 (OMe), 59.7 (α-C), 78.8 (C<sup>1</sup>Bu), 114.3, 127.9, 129.3, and 155.9 (Ar), 159.3, 169.9, and 171.0 (CO). MS (ES positive mode): 493.1 (M+Na)<sup>+</sup>. Anal Calc. for C<sub>23</sub>H<sub>35</sub>ClN<sub>2</sub>O<sub>6</sub>: C 58.65, H 7.49, N 5.95. Found: C 58.68, H 7.46, N 5.98.

***N*-(*p*-Methoxy)benzyl-*N*-(2*S*)-chloropropionyl-L-Glu(O<sup>1</sup>Bu)-O<sup>1</sup>Bu (11a)**

Eluent: EtOAc:CH<sub>2</sub>Cl<sub>2</sub> (1:30). Syrup. Yield: 52% (Method B, from **8**). HPLC (Novapak): t<sub>R</sub> = 5.81 min, (A:B = 40:60). Chiral HPLC: t<sub>R</sub> = 10.66 min, (EtOH/Hexane, 1:99). [α]<sub>D</sub> = -37.02 (c = 0.74, CHCl<sub>3</sub>). <sup>1</sup>H NMR (300 MHz, CDCl<sub>3</sub>): 1.37 (s, 9H, CH<sub>3</sub><sup>1</sup>Bu), 1.41 (s, 9H, CH<sub>3</sub><sup>1</sup>Bu), 1.63 (d, 3H, J=6.5, 3-H), 1.95 (m, 1H, β-H), 2.25 (m, 2H, γ-H), 2.31 (m, 1H, β-H), 3.80 (s, 3H, OMe), 4.28 (t, 1H, J=6.8, α-H), 4.53 (q, 1H, J=6.5, 2-H), 4.61 (s, 2H, CH<sub>2</sub>-N), 6.88 (d, 2H, J=8.6, C<sub>6</sub>H<sub>4</sub>), 7.21 (d, 2H, J=8.6, C<sub>6</sub>H<sub>4</sub>). <sup>13</sup>C NMR (75 MHz, CDCl<sub>3</sub>): 20.9 (3-C), 24.8 (β-C), 27.7 (CH<sub>3</sub><sup>1</sup>Bu), 27.9 (CH<sub>3</sub><sup>1</sup>Bu), 32.0 (γ-C), 49.9 (2-C), 50.2 (CH<sub>2</sub>-N), 55.2 (OMe), 58.7 (α-C), 80.3 (C<sup>1</sup>Bu), 81.7 (C<sup>1</sup>Bu), 114.1, 127.9, 128.4, and 159.2 (Ar), 169.0, 169.5, and 172.2 (CO). MS (ES positive mode): 470.13 (M+1)<sup>+</sup>. Anal Calc. For C<sub>24</sub>H<sub>36</sub>ClNO<sub>6</sub>: C 61.33, H 7.72, N 2.98. Found: C 61.35, H 7.50, N 3.01.

***N*-(*p*-methoxy)benzyl-*N*-(2*R*)-chloropropionyl-L-Glu(O<sup>1</sup>Bu)-O<sup>1</sup>Bu (11b)**

Eluent: EtOAc:CH<sub>2</sub>Cl<sub>2</sub> (1:30). Syrup. Yield: 65% (Method B, from **8**). HPLC (Novapak): t<sub>R</sub> = 5.99 min, (A:B = 40:60). Chiral HPLC: t<sub>R</sub> = 7.23 min, (EtOH/Hexane 1:99). [α]<sub>D</sub> = -62.34 (c = 1.08, CHCl<sub>3</sub>). <sup>1</sup>H NMR (300 MHz, CDCl<sub>3</sub>): 1.41 (s, 9H, CH<sub>3</sub><sup>1</sup>Bu), 1.44 (s, 9H, CH<sub>3</sub><sup>1</sup>Bu), 1.59 (d, 3H, J=6.6, 3-H), 1.97 (m, 1H, β-H), 2.04 (m, 1H, β-H), 2.32 (m, 2H, γ-H), 3.80 (s, 3H, OMe), 4.17 (t, 1H, J=6.1, α-H), 4.38 (d, 1H, J=17.1, CH<sub>2</sub>-N), 4.44 (q, 1H, J=6.5, 2-H), 4.87 (d, 1H, J=17.1, CH<sub>2</sub>-N), 6.88 (d, 2H, J=8.7, C<sub>6</sub>H<sub>4</sub>), 7.25 (d, 2H, J=8.7,

C<sub>6</sub>H<sub>4</sub>). <sup>13</sup>C NMR (75 MHz, CDCl<sub>3</sub>): 20.7 (3-C), 24.3 (β-C), 27.9 (CH<sub>3</sub><sup>1</sup>Bu), 28.0 (CH<sub>3</sub><sup>1</sup>Bu), 32.0 (γ-C), 49.7 (2-C), 50.9 (CH<sub>2</sub>-N), 55.2 (OMe), 59.9 (α-C), 80.4 (C<sup>1</sup>Bu), 81.6 (C<sup>1</sup>Bu), 114.2, 127.8, 129.3, and 159.1 (Ar), 168.9, 169.4, and 172.3 (CO). MS (ES positive mode): 470.26 (M+1)<sup>+</sup>. Anal Calc. For C<sub>24</sub>H<sub>36</sub>ClNO<sub>6</sub>: C 61.33, H 7.72, N 2.98, Cl 7.54 Found: C 61.14, H 7.74, N 2.67, Cl 7.51.

**Synthesis of 2-azetidinone derivatives**

A solution of the corresponding *N*-(*p*-methoxybenzyl)-*N*-chloropropionyl derivative (1 mmol) in dry MeCN (12 mL) was treated with CsCO<sub>3</sub> (2 mmol) or BTPP (1.5 mmol) and stirred at room temperature until disappearance of the starting material. The solvent was then evaporated to dryness, and the residue was partitioned between EtOAc and H<sub>2</sub>O. The organic layer was dried over Na<sub>2</sub>SO<sub>4</sub> and after evaporation the residue was purified on a silica gel column as specified in each case.

**(3*S*,4*S*)-4-Benzyl-1-(*p*-methoxy)benzyl-4-methoxycarbonyl-3-methyl-2-azetidinone (5a)**

Eluent: Hexane: EtOAc (5:1 to 3:1). Syrup. Yield: 70% (from **3a** and **3c**). HPLC (Novapak): t<sub>R</sub> = 10.72 min (A:B = 40:60). Chiral HPLC: t<sub>R</sub> = 12.49 min (EtOH/hexane, 5:95). [α]<sub>D</sub> = -6.6 (c = 1, CHCl<sub>3</sub>). <sup>1</sup>H NMR (300MHz, CDCl<sub>3</sub>): δ 1.14 (d, 3H, J = 7.6, 3-CH<sub>3</sub>), 3.10 (d, 1H, J = 14.7, 4-CH<sub>2</sub>), 3.15 (q, 1H, J = 7.6, 3-H), 3.33 (d, 1H, J = 14.4, 4-CH<sub>2</sub>), 3.71 (s, 3H, OMe), 3.80 (s, 3H, OMe), 4.13 (d, 1H, J = 15.3, 1-CH<sub>2</sub>), 4.40 (d, 1H, J = 15.3, 1-CH<sub>2</sub>), 6.83 (d, 2H, J = 8.6, C<sub>6</sub>H<sub>4</sub>), 6.93-6.96 (m, 2H, C<sub>6</sub>H<sub>5</sub>), 7.14 (d, 2H, J = 8.6, C<sub>6</sub>H<sub>4</sub>), 7.19-7.22 (m, 3H, C<sub>6</sub>H<sub>5</sub>). <sup>13</sup>C NMR (75 MHz, CDCl<sub>3</sub>): δ 10.02 (3-CH<sub>3</sub>), 40.36 (4-CH<sub>2</sub>), 45.43 (CH<sub>2</sub>-N), 51.16 (3-C), 53.48 (OMe), 55.21 (OMe), 68.96 (4-C), 113.70, 127.13, 128.44, 128.87, 129.38, 129.89, 135.03, and 158.82 (Ar), 169.58, and 171.69 (CO). EM (ES positive mode): 354.1 (M+1)<sup>+</sup>. Anal Calc. for C<sub>21</sub>H<sub>23</sub>NO<sub>4</sub>: C 71.37, H 6.56, N 3.96. Found: C 70.95, H 6.44, N 4.01.

**(3*R*,4*R*)-4-Benzyl-1-(*p*-methoxy)benzyl-4-methoxycarbonyl-3-methyl-2-azetidinone (5b)**

Eluent: Hexane: EtOAc (5:1 to 3:1). Syrup. Yield: 66% and 69% (from **3b** and **3d**, respectively). Chiral HPLC: t<sub>R</sub> = 11.44 min (EtOH/hexane, 5:95). [α]<sub>D</sub> = +6.7 (c = 1, CHCl<sub>3</sub>). Anal Calc. for C<sub>21</sub>H<sub>23</sub>NO<sub>4</sub>: C 71.37, H 6.56, N 3.96. Found: C 71.17, H 6.38, N 4.00.

**(3*S*,4*S*)-1-(*p*-methoxy)benzyl-3,4-dimethyl-4-methoxycarbonyl-2-azetidinone (12a)**

Eluent: Hexane: EtOAc (3:1 to 2:1). Syrup. Yield: 66% (from **6**). HPLC (Novapak): t<sub>R</sub> = 5.87 min (A:B = 35:65). [α]<sub>D</sub> = -49.6 (c = 0.51, CHCl<sub>3</sub>). <sup>1</sup>H NMR (300MHz, CDCl<sub>3</sub>): δ 1.16 (d, 3H, J = 7.5, 3-CH<sub>3</sub>), 1.29 (s, 3H, 4-CH<sub>3</sub>), 3.04 (q, 1H, J = 7.5, 3-H), 3.73 (s, 3H, OMe), 3.79 (s, 3H, OMe), 4.12 (d, 1H, J = 15.0, 1-CH<sub>2</sub>), 4.71 (d, 1H, J = 15.0, 1-CH<sub>2</sub>), 6.84 (d, 2H, J = 8.7, C<sub>6</sub>H<sub>4</sub>), 7.22 (d, 2H, J = 8.7, C<sub>6</sub>H<sub>4</sub>). <sup>13</sup>C NMR (75 MHz, CDCl<sub>3</sub>): δ 9.72 (3-CH<sub>3</sub>), 21.24 (4-CH<sub>3</sub>), 43.89 (CH<sub>2</sub>-N), 51.82 (3-C), 54.95 (OMe), 56.21 (OMe), 64.53 (4-C), 113.68, 127.98,

129.73, and 158.87 (Ar), 168.49, and 171.85 (CO). EM (ES positive mode): 278.0 (M+1)<sup>+</sup>. Anal Calc. for C<sub>15</sub>H<sub>19</sub>NO<sub>4</sub>: C 64.97, H 6.91, N 5.05. Found: C 65.83, H 6.73, N 4.90.

**(3R,4R)-1-(p-methoxy)benzyl-3,4-dimethyl-4-methoxycarbonyl-2-azetidinone (12b)**

Eluent: Hexane: EtOAc (3:1 to 2:1). Syrup. Yield: 54% (from **6**). HPLC (Novapak): t<sub>R</sub> = 5.80 min (A:B = 35:65). [α]<sub>D</sub> = +48.8 (c = 0.49, CHCl<sub>3</sub>). Anal Calc. for C<sub>15</sub>H<sub>19</sub>NO<sub>4</sub>: C 64.97, H 6.91, N 5.05. Found: C 65.70, H 6.98, N 5.14.

**(3S,4S)-1-(p-methoxy)benzyl-4-[4'-(tert-butoxycarbonyl)amino]butyl-3-methyl-4-methoxycarbonyl-2-azetidinone (13a)**

Eluent: EtOAc:hexane (1:4 to 1:3). Syrup. Yield: 67% (from **10a**). [α]<sub>D</sub> = -17.4 (c = 1.18, CHCl<sub>3</sub>). Chiral HPLC: t<sub>R</sub> = 12.30 min, (EtOH/Hexane, 7:93). <sup>1</sup>H NMR (300 MHz, CDCl<sub>3</sub>): 0.99 (m, 1H, 2'-H), 1.11 (m, 3H, 2'-H and 3'-H), 1.16 (d, 3H, J=7.5, 3-CH<sub>3</sub>), 1.44 (s, 9H, CH<sub>3</sub> Boc), 1.72 (m, 2H, 1'-H), 2.88 (m, 2H, 4'-H), 3.14 (q, 1H, J=7.5, 3-H), 3.46 (s, 3H, OMe), 3.79 (s, 3H, OMe), 4.11 (d, 1H, J=15.4, 1-CH<sub>2</sub>), 4.31 (brs, 1H, 4'-NH), 4.77 (d, 1H, J=15.4, 1-CH<sub>2</sub>), 6.86 (d, 2H, J=8.7, C<sub>6</sub>H<sub>4</sub>), 7.22 (d, 2H, J=8.7, C<sub>6</sub>H<sub>4</sub>). <sup>13</sup>C NMR (75 MHz, CDCl<sub>3</sub>): 10.1 (3-CH<sub>3</sub>), 21.3 (2'-C), 28.4 (CH<sub>3</sub> <sup>t</sup>Bu), 29.9 (3'-C), 34.1 (1'-C), 39.9 (4'-C), 44.5 (1-CH<sub>2</sub>), 52.0 (OMe), 52.9 (3-C), 55.2 (OMe), 68.6 (4-C), 79.1 (C <sup>t</sup>Bu), 113.9, 128.8, 129.7, and 155.8 (Ar), 159.1, 169.3, and 171.8 (CO). EM (ES positive mode): 457.1 (M+Na)<sup>+</sup>. Anal Calc. For C<sub>23</sub>H<sub>34</sub>N<sub>2</sub>O<sub>6</sub>: C 63.57, H 7.89, N 6.45. Found: C 63.45, H 7.86, N 6.48.

**(3R,4R)-1-(p-methoxy)benzyl-4-[4'-(tert-butoxycarbonyl)amino]butyl-3-methyl-4-methoxycarbonyl-2-azetidinone (13b)**

Eluent: EtOAc:hexane (1:4 to 1:3). Syrup. Yield: 77% (from **10b**). Chiral HPLC: t<sub>R</sub> = 16.22 min, (EtOH/Hexane, 7:93). [α]<sub>D</sub> = +15.2 (c = 1.17, CHCl<sub>3</sub>). EM (ES positive mode): 457.1 (M+Na)<sup>+</sup>. Anal Calc. For C<sub>23</sub>H<sub>34</sub>N<sub>2</sub>O<sub>6</sub>: C 63.57, H 7.89, N 6.45. Found: C 63.42, H 7.69, N 6.41.

**(3S,4S)-1-(p-methoxy)benzyl-4-tert-butoxycarbonyl-4-(2-tert-butoxycarbonyl)ethyl-3-methyl-2-azetidinone (14a)**

Eluent: EtOAc:hexane (1:9 to 1:5). Syrup. Yield: 48% (from **11a**). HPLC (Novapak): t<sub>R</sub> = 6.01 min, (A:B = 40:60). Chiral HPLC: t<sub>R</sub> = 11.39 min, (EtOH/Hexane 2:98). [α]<sub>D</sub> = -23.70 (c = 0.945, CHCl<sub>3</sub>). <sup>1</sup>H NMR (300 MHz, CDCl<sub>3</sub>): 1.22 (d, 3H, J=7.6, 3-CH<sub>3</sub>), 1.35 (s, 9H, CH<sub>3</sub> <sup>t</sup>Bu), 1.49 (s, 9H, CH<sub>3</sub> <sup>t</sup>Bu), 1.96 (m, 4H, 1'-H and 2'-H), 3.08 (c, 1H, J=7.6, 3-H), 3.78 (s, 3H, OMe), 4.09 (d, 1H, J=15.4, 1-CH<sub>2</sub>), 4.87 (d, 1H, J=15.4, 1-CH<sub>2</sub>), 6.84 (d, 2H, J=8.8, C<sub>6</sub>H<sub>4</sub>), 7.24 (d, 2H, J=8.8, C<sub>6</sub>H<sub>4</sub>). <sup>13</sup>C NMR (75 MHz, CDCl<sub>3</sub>): 10.4 (3-CH<sub>3</sub>), 27.9 (CH<sub>3</sub> <sup>t</sup>Bu), 28.1 (CH<sub>3</sub> <sup>t</sup>Bu), 29.5, and 29.9 (β-C and γ-C), 44.3 (1-CH<sub>2</sub>), 52.7 (3-C), 55.1 (OMe), 67.7 (α-C), 80.4, and 82.9 (C <sup>t</sup>Bu), 113.9, 128.5, 129.7, 159.0 (Ar), 169.3, 169.9,

and 171.5 (CO). MS (ES positive mode): 434.13 (M+1)<sup>+</sup>. Anal Calc. For C<sub>24</sub>H<sub>35</sub>NO<sub>6</sub>: C 66.49, H 8.14, N 3.23. Found: C 66.25, H 8.27, N 3.05.

**(3R,4R)-1-(p-methoxy)benzyl-4-tert-butoxycarbonyl-4-(2-tert-butoxycarbonyl)ethyl-3-methyl-2-azetidinone (14b)**

Eluent: EtOAc:hexane (1:9 to 1:5). Syrup. Yield: 54% (from **11b**). HPLC (Novapak): t<sub>R</sub> = 6.01 min, (A:B = 40:60). Chiral HPLC: t<sub>R</sub> = 21.65 min, (EtOH/Hexane 2:98). [α]<sub>D</sub> = +19.79 (c = 1.01, CHCl<sub>3</sub>). MS (ES positive mode): 434.13 (M+1)<sup>+</sup>. Anal Calc. For C<sub>24</sub>H<sub>35</sub>NO<sub>6</sub>: C 66.49, H 8.14, N 3.23. Found: C 66.20, H 8.02, N 3.24.

**Synthesis of dipeptide derivatives**

*General procedure:* A solution of the corresponding 2-azetidinone (0.82 mmol) in MeOH (10 mL) was treated with 2M NaOH (2 mmol), and stirred overnight at room temperature. The solvent was evaporated and the residue was dissolved in H<sub>2</sub>O (8 mL) and acidified with 1M HCl to pH=3. The aqueous layer was extracted with EtOAc, the phases were separated and the organic layer was dried over Na<sub>2</sub>SO<sub>4</sub> and the solvent evaporated. A portion of the carboxylic acid obtained (0.175mmol) was dissolved in dry THF (2 mL), and then treated with H-L-Xaa-OMe.HCl (0.35 mmol), BOP (0.35mmol) and TEA (0.70mmol) in this order. The solution was stirred for 48 h at room temperature. The solvent was evaporated and the residue was extracted with EtOAc, and washed with citric acid (10%), HNaCO<sub>3</sub> (10%) and brine. The organic layer was dried over Na<sub>2</sub>SO<sub>4</sub> and, after evaporation of the solvent, the residue was purified on a silica gel column as specified in each case.

**(3S,4S,1'S)-4-Benzyl-1-(p-methoxy)benzyl-4-[N-(1'-(methoxycarbonyl)ethyl]carbamoyl-3-methyl-2-azetidinone (15a)**

Eluent: Hexane: EtOAc (3:1 to 2:1). Syrup. Yield: 66% (from **5a**). HPLC (Novapak): t<sub>R</sub> = 13.34 min (A:B = 40:60). <sup>1</sup>H NMR (300 MHz, CDCl<sub>3</sub>): δ 0.84 (d, 3H, J = 7.3, 2'-H), 1.08 (d, 3H, J = 7.5, 3-CH<sub>3</sub>), 3.08 – 3.24 (m, 2H, 3-H, 4-CH<sub>2</sub>), 3.63 (s, 3H, OMe), 3.70 (m, 2H, 4-CH<sub>2</sub>, CH<sub>2</sub>-N), 3.72 (s, 1H, OMe), 4.24 (m, 1H, 1'-H), 4.61 (d, 1H, J = 15.4, CH<sub>2</sub>-N), 5.62 (d, 1H, J = 7.1, 1'-NH), 6.75 (d, 2H, J = 8.6, C<sub>6</sub>H<sub>4</sub>), 7.05 (d, 2H, J = 8.6, C<sub>6</sub>H<sub>4</sub>), 7.15 – 7.32 (m, 5H, C<sub>6</sub>H<sub>5</sub>). Anal Calc. for C<sub>24</sub>H<sub>28</sub>N<sub>2</sub>O<sub>5</sub>: C 67.91, H 6.65, N 6.60. Found: C, 67.49, H 6.32, N 6.38.

**(3R,4R,1'S)-4-Benzyl-1-(p-methoxy)benzyl-4-[N-(1'-(methoxycarbonyl)ethyl]carbamoyl-3-methyl-2-azetidinone (15b).**

Eluent: Hexane: EtOAc (3:1 to 2:1). Syrup. Yield: 70% (from **5b**). HPLC (Novapak): t<sub>R</sub> = 15.02 min (A:B = 40:60). <sup>1</sup>H NMR (300 MHz, CDCl<sub>3</sub>): δ 0.71 (d, 3H, J = 7.1, 2'-H), 1.13 (d, 3H, J = 7.6, 3-CH<sub>3</sub>), 3.05 – 3.12 (m, 2H, 3-H, 4-CH<sub>2</sub>), 3.56 (s, 3H, OMe), 3.63 (d, 1H, J = 15.1, CH<sub>2</sub>-N), 3.68 (s, 1H, OMe), 3.75 (d, 1H, J = 14.4, 4-CH<sub>2</sub>), 4.29 (m, 1H, 1'-H), 4.70 (d, 1H, J = 15.1, CH<sub>2</sub>-N),

5.84 (d, 1H,  $J = 7.5$ , 1'-NH), 6.73 (d, 2H,  $J = 8.5$ , C<sub>6</sub>H<sub>4</sub>), 6.90 (d, 2H,  $J = 8.5$ , C<sub>6</sub>H<sub>4</sub>), 7.17 – 7.29 (m, 5H, C<sub>6</sub>H<sub>5</sub>). Anal Calc. for C<sub>24</sub>H<sub>28</sub>N<sub>2</sub>O<sub>5</sub>: C 67.91, H 6.65, N 6.60. Found: C 67.55, H 6.90, N 6.57.

**(3S,4S,1'S)-1-(*p*-Methoxy)benzyl-4-[*N*-(1'-(methoxycarbonyl-2''-phenyl)ethyl)carbamoyl-3,4-dimethyl-2-azetidinone (16a)**

Eluent: Hexane: EtOAc (1:1 to 1:2). Syrup. Yield: 69% (from **12a**). HPLC (Novapak):  $t_R = 13.20$  min (A:B = 35:65). <sup>1</sup>H NMR (300MHz, CDCl<sub>3</sub>):  $\delta$  0.73 (d, 3H,  $J = 7.5$ , 3-CH<sub>3</sub>), 1.46 (s, 3H, 4-CH<sub>3</sub>), 2.50 (dd, 1H,  $J = 9.6$ , 12.6, 2'-H), 2.94 (q, 1H,  $J = 7.8$ , 3-H), 3.04 (dd, 1H,  $J = 5.1$ , 13.8, 2'-H), 3.72 (s, 3H, OMe), 3.80 (s, 3H, OMe), 4.11 (d, 1H,  $J = 15.0$ , 1-CH<sub>2</sub>), 4.42 (d, 1H,  $J = 15.0$ , 1-CH<sub>2</sub>), 4.59-4.66 (m, 1H, 1'-H), 5.94 (d, 1H,  $J = 8.1$ , 1'-NH), 6.89 (d, 2H,  $J = 8.1$ , C<sub>6</sub>H<sub>4</sub>), 6.95 (m, 2H, C<sub>6</sub>H<sub>5</sub>), 7.21-7.31 (m, 3H, C<sub>6</sub>H<sub>5</sub>), 7.33 (d, 2H,  $J = 8.4$ , C<sub>6</sub>H<sub>4</sub>). EM (ES positive mode): 425.2 (M+1)<sup>+</sup>, 447.3 (M+Na)<sup>+</sup>. Anal Calc. for C<sub>24</sub>H<sub>28</sub>N<sub>2</sub>O<sub>5</sub>: C 67.91, H 6.65, N 6.60. Found: C 68.06, H 6.79, N 6.25.

**(3R,4R,1'S)-1-(*p*-Methoxy)benzyl-4-[*N*-(1'-(methoxycarbonyl-2''-phenyl)ethyl)carbamoyl-3,4-dimethyl-2-azetidinone (16b)**

Eluent: Hexane: EtOAc (2:1). Yield: 45% (from **12b**). HPLC (Novapak):  $t_R = 15.25$  min (A:B = 35:65). <sup>1</sup>H NMR (300MHz, CDCl<sub>3</sub>):  $\delta$  1.16 (d, 3H,  $J = 7.5$ , 3-CH<sub>3</sub>), 1.37 (s, 3H, 4-CH<sub>3</sub>), 2.70 (dd, 1H,  $J = 14.1$ , 7.5, 2'-H), 2.96-3.05 (m, 2H, 2'-H, 3-H), 3.67 (s, 3H, OMe), 3.78 (s, 3H, OMe), 3.96 (d, 1H,  $J = 15.2$ , 1-CH<sub>2</sub>), 4.19 (d, 1H,  $J = 15.2$ , 1-CH<sub>2</sub>), 4.74 (m, 1H, 1'-H), 6.20 (d, 1H,  $J = 7.5$ , 1'-NH), 6.84 (d, 2H,  $J = 8.4$ , C<sub>6</sub>H<sub>4</sub>), 7.07 (m, 2H, C<sub>6</sub>H<sub>5</sub>), 7.11 (d, 2H,  $J = 8.4$ , C<sub>6</sub>H<sub>4</sub>), 7.24-7.35 (m, 3H, C<sub>6</sub>H<sub>5</sub>). EM (ES positive mode): 425.2 (M+1)<sup>+</sup>. Anal Calc. for C<sub>24</sub>H<sub>28</sub>N<sub>2</sub>O<sub>5</sub>: C 67.91, H 6.65, N 6.60. Found: C 67.89, H 6.31, N 6.44.

**(3S,4S,1'S)-1-(*p*-Methoxy)benzyl-4-[4'-(*tert*-butoxycarbonyl)amino]butyl-4-[*N*-(1'-(methoxycarbonyl-2''-phenyl)ethyl)carbamoyl-3-methyl-2-azetidinone (17a)**

Eluent: EtOAc:hexane (1:4 to 1:2). Syrup. Yield: 63% (from **13a**). HPLC (Novapak):  $t_R = 7.93$  min, (A:B = 45:55).  $[\alpha]_D = -28.71$  ( $c = 0.89$ , CHCl<sub>3</sub>). <sup>1</sup>H NMR (300 MHz, CDCl<sub>3</sub>): 0.63 (d,  $J = 7.6$ , 3H, 3-CH<sub>3</sub>), 1.11 (m, 1H, 3'-H), 1.28 (m, 3H, 2'-H and 3'-H), 1.36 (s, 9H, CH<sub>3</sub><sup>t</sup>Bu), 1.85 (m, 2H, 2'-H), 2.36 (m, 1H, 2''-H), 2.94 (m, 4H, H<sub>3</sub>, 2''-H, 4'-H), 3.65 (s, 3H, OMe), 3.72 (s, 3H, OMe), 4.05 (d, 1H,  $J = 15.1$ , 1-CH<sub>2</sub>), 4.39 (d, 1H,  $J = 15.1$ , 1-CH<sub>2</sub>), 4.45 (brs, 1H, 4'-NH), 4.57 (m, 1H, 1''-H), 5.88 (d, 1H,  $J = 8.3$ , 1''-NH), 7.29-6.80 (m, 9H, Ar), <sup>13</sup>C NMR (75 MHz, CDCl<sub>3</sub>): 9.3 (3-CH<sub>3</sub>), 21.0 (2'-C), 28.3 (CH<sub>3</sub><sup>t</sup>Bu), 30.0 (3'-C), 32.8 (1'-C), 37.0 (2''-C), 39.9 (4'-C), 44.4 (1-CH<sub>2</sub>), 52.3 (OMe), 52.8 (3-C), 53.1 (1''-C), 55.3 (OMe), 69.5 (4-C), 79.1 (C<sup>t</sup>Bu), 114.3, 127.2, 128.6, 130.5, 135.8, 155.9 (Ar), 159.5, 170.5, 170.9, 171.4 (CO). EM (ES positive mode): 604.2 (M+Na)<sup>+</sup>. Anal

Calc. For C<sub>32</sub>H<sub>43</sub>N<sub>3</sub>O<sub>7</sub>: C 66.07, H 7.45, N 7.22. Found: C 65.98, H 7.47, N 7.26.

**(3R,4R,1'S)-1-(*p*-Methoxy)benzyl-4-[4'-(*tert*-butoxycarbonyl)amino]butyl-4-[*N*-(1'-(methoxycarbonyl-2''-phenyl)ethyl)carbamoyl-3-methyl-2-azetidinone (17b).**

Eluent: EtOAc:hexane (1:4 to 1:2). Syrup. Yield: 63% (from **13b**). HPLC (Novapak):  $t_R = 8.35$  min, (A:B = 45:55).  $[\alpha]_D = -48.39$  ( $c = 1.07$ , CHCl<sub>3</sub>). <sup>1</sup>H NMR (300 MHz, CDCl<sub>3</sub>): 0.89 (m, 1H, 3'-H), 1.07 (d,  $J = 7.6$ , 3H, 3-CH<sub>3</sub>), 1.12 (m, 3H, 2'-H, 3'-H), 1.37 (s, 9H, CH<sub>3</sub><sup>t</sup>Bu), 1.70 (m, 2H, 1'-H), 2.63 (m, 1H, 2''-H), 2.87 (m, 2H, 4'-H), 3.01 (m, 2H, H-3, 2''-H), 3.61 (s, 3H, OMe), 3.71 (s, 3H, OMe), 3.89 (d, 1H,  $J = 15.4$ , 1-CH<sub>2</sub>), 4.19 (d, 1H,  $J = 15.4$ , 1-CH<sub>2</sub>), 4.41 (brs, 1H, 4'-NH), 4.75 (m, 1H, 1''-H), 6.21 (d, 1H,  $J = 8.1$ , 1''-NH), 7.27-6.79 (m, 9H, Ar), <sup>13</sup>C NMR (75 MHz, CDCl<sub>3</sub>): 9.6 (CH<sub>3</sub>), 21.1 (2'-C), 28.2 (CH<sub>3</sub><sup>t</sup>Bu), 29.6 (3'-C), 33.2 (1'-C), 37.2 (2''-C), 39.6 (4'-C), 43.9 (1-CH<sub>2</sub>), 52.1 (OMe), 52.4 (1''-C), 53.4 (3-C), 55.1 (OMe), 69.3 (4-C), 78.8 (C<sup>t</sup>Bu), 114.1, 126.9, 128.4, 128.6, 129.25, 135.7, and 155.6 (Ar), 159.1, 169.8, 170.9, and 171.2 (CO). EM (ES positive mode): 604.3 (M+Na)<sup>+</sup>. Anal Calc. For C<sub>32</sub>H<sub>43</sub>N<sub>3</sub>O<sub>7</sub>: C 66.07, H 7.45, N 7.22. Found: C 66.11, H 7.48, N 7.18.

**Synthesis of 4-Benzyl-1-(*p*-methoxy)benzyl-4-hydroxymethyl-3-methyl-2-azetidinone (18a)**

Compound **5a** (70.5 mg, 0.20mmol) was dissolved in MeOH (2.4mL), and treated with NaOH (0.3mL, 0.60mmol), then left stirring for 24 h. The solvent was evaporated and the residue dissolved in H<sub>2</sub>O (4mL) and acidified with 1M HCl to pH=3. The aqueous layer was extracted with EtOAc, the phases were separated and the organic layer was dried over Na<sub>2</sub>SO<sub>4</sub> and the solvent was evaporated to yield 56 mg (84%) of the corresponding free carboxylic acid. HPLC (Novapak):  $t_R = 9.04$  min (A:B = 35:65). <sup>1</sup>H NMR (300MHz, CDCl<sub>3</sub>):  $\delta$  1.24 (d, 3H,  $J = 7.8$ , 3-CH<sub>3</sub>), 3.11 (d, 1H,  $J = 14.4$ , 4-CH<sub>2</sub>), 3.21 (q, 1H,  $J = 7.5$ , 3-H), 3.32 (d, 1H,  $J = 14.4$ , 4-CH<sub>2</sub>), 3.80 (s, 3H, OMe), 4.08 (d, 1H,  $J = 15.3$ , 1-CH<sub>2</sub>), 4.56 (d, 1H,  $J = 15.3$ , 1-CH<sub>2</sub>), 6.84 (d, 2H,  $J = 8.5$ , C<sub>6</sub>H<sub>4</sub>), 6.94 (d, 2H,  $J = 8.5$ , C<sub>6</sub>H<sub>4</sub>), 7.16-7.26 (m, 5H, C<sub>6</sub>H<sub>5</sub>). EM (ES positive mode): 340.1 (M+1)<sup>+</sup>.

A solution of this compound (45 mg, 0.13mmol) in dry THF (1mL) was cooled to -15°C. Then, NMM (14μL, 0.13mmol) and isobutyl chloroformate (68.6μL, 0.13mmol) were added and the solution was stirred for 10 min. The *N*-methyilmorpholine hydrochloride precipitate formed was removed by filtration and washed with THF. The filtrate was then cooled to -15°C and a solution of NaBH<sub>4</sub> (7.18mg, 0.19mmol) in H<sub>2</sub>O (2.33mL) was added. After 1 h the solvents were evaporated to dryness and the remaining residue was separated between H<sub>2</sub>O and EtOAc. The organic layer was washed with citric acid (10%), HNaCO<sub>3</sub> (10%) and brine, dried over Na<sub>2</sub>SO<sub>4</sub> and, after evaporation, the residue was purified on a silica gel column using Hexane: EtOAc (5:1 to 3:1) as eluent. The title compound 33.4 mg (79%) was obtained as a

syrup. HPLC (Novapak):  $t_R = 8.75$  min (A:B = 35:65).  $^1\text{H}$  NMR (300MHz,  $\text{CDCl}_3$ ):  $\delta$  1.00 (d, 3H,  $J = 7.6$ , 3- $\text{CH}_3$ ), 2.70 (d, 1H,  $J = 13.4$ , 4- $\text{CH}_2$ ), 3.06-3.41 (m, 2H, 3-H, 4- $\text{CH}_2$ ), 3.41 (s, 2H,  $\text{CH}_2\text{-OH}$ ), 3.73 (s, 3H, OMe), 4.03 (d, 1H,  $J = 15.1$ , 1- $\text{CH}_2$ ), 4.63 (d, 1H,  $J = 15.1$ , 1- $\text{CH}_2$ ), 6.81 (d, 2H,  $J = 8.6$ ,  $\text{C}_6\text{H}_4$ ), 7.10-7.25 (m, 7H,  $\text{C}_6\text{H}_4$ ,  $\text{C}_6\text{H}_5$ ). EM (ES positive mode): 326.3 ( $\text{M}+1$ ) $^+$ . Anal. Calc. for  $\text{C}_{20}\text{H}_{23}\text{NO}_3$ : C 73.82, H 7.12, N 4.30. Found: C 73.47, H 7.46, N 4.06.

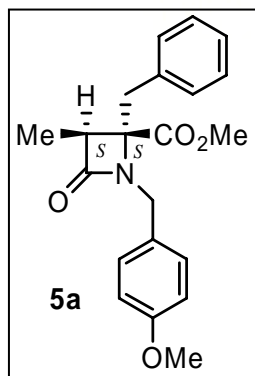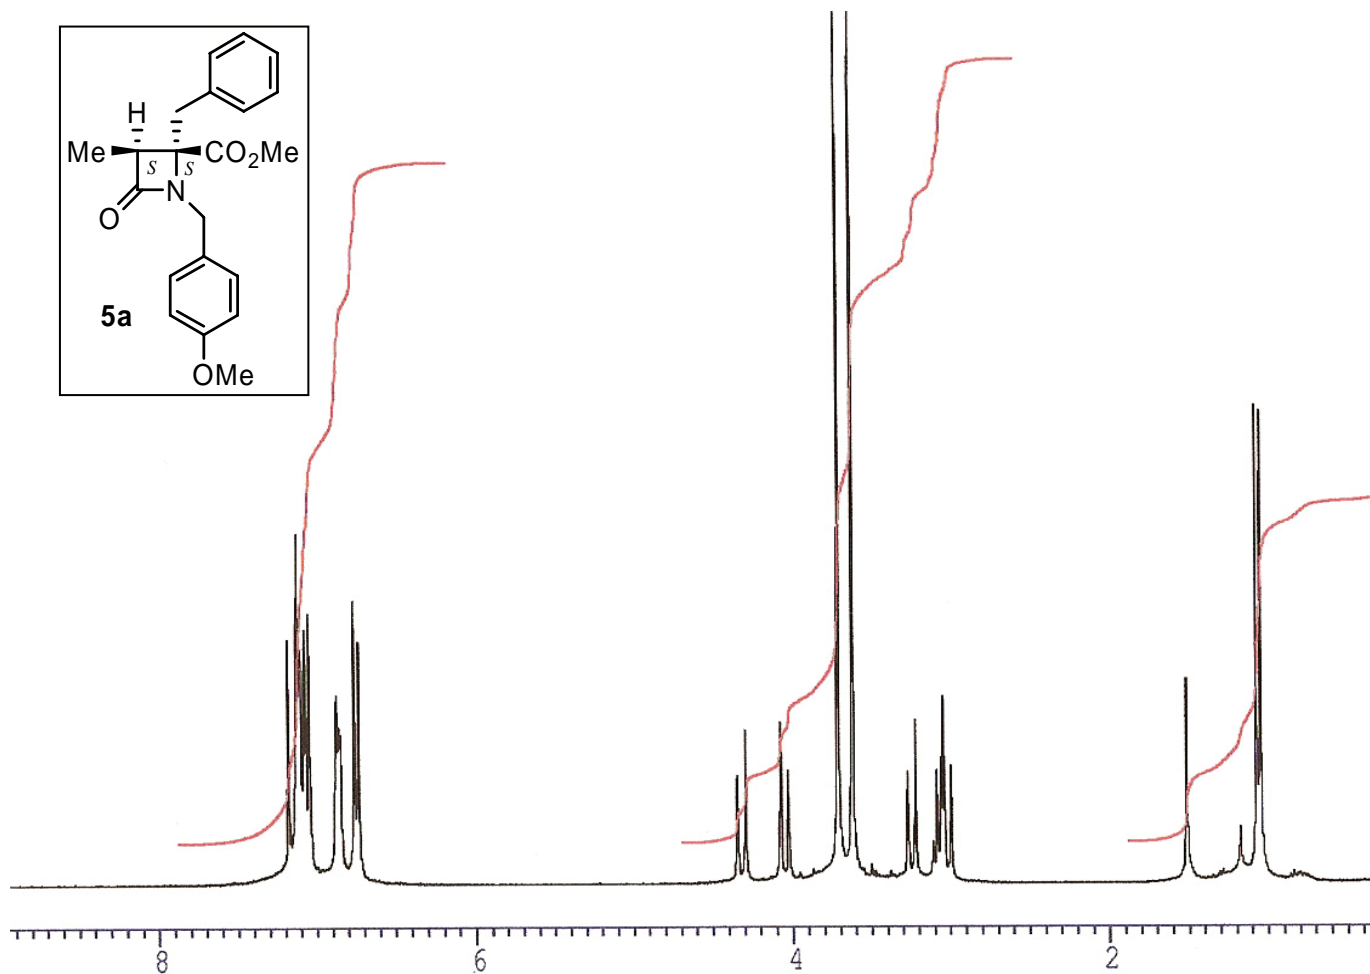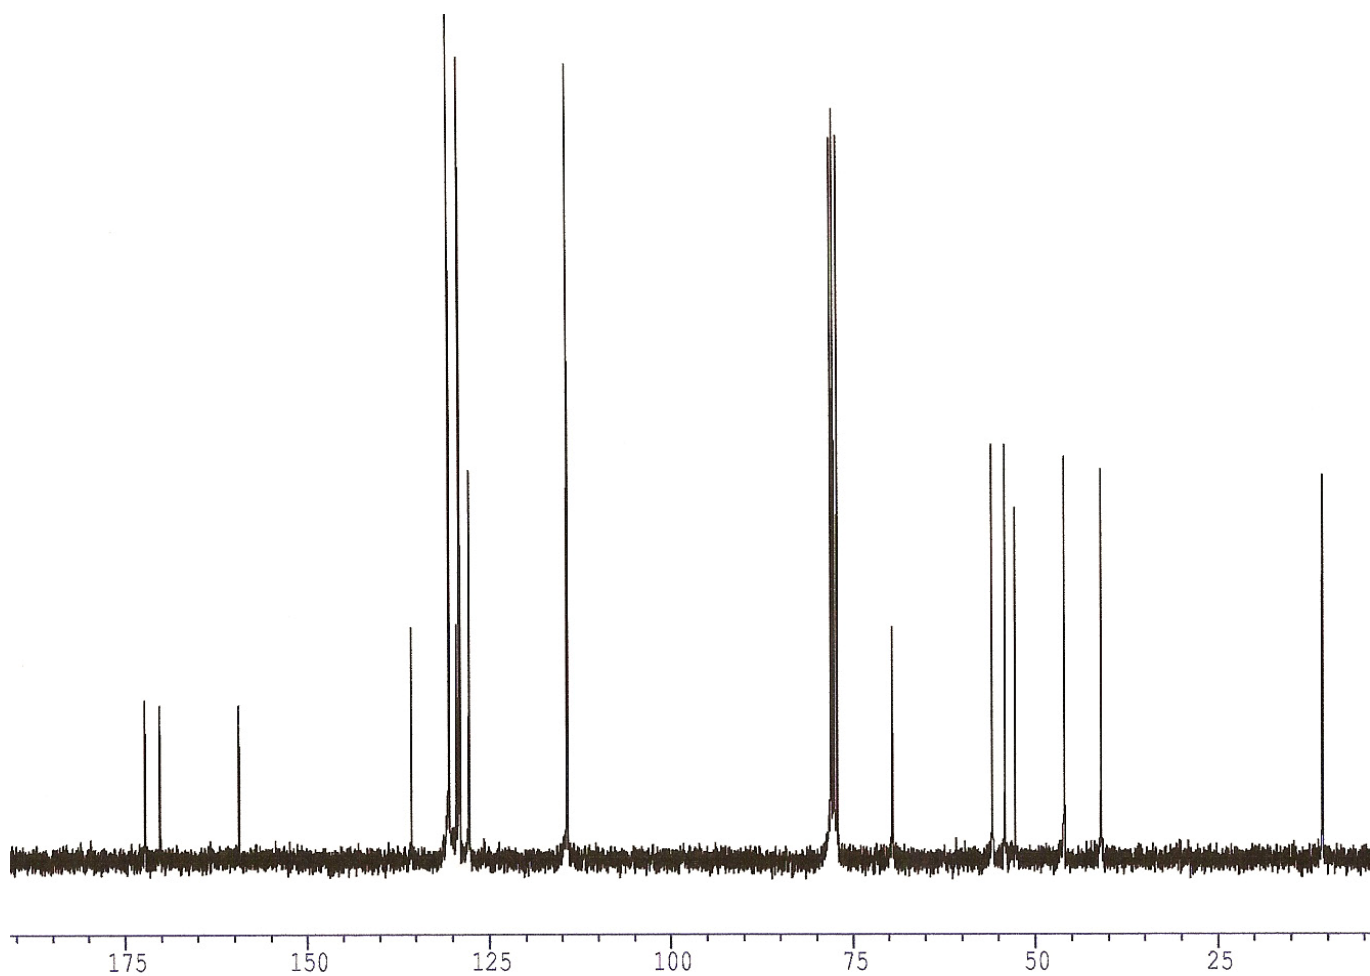

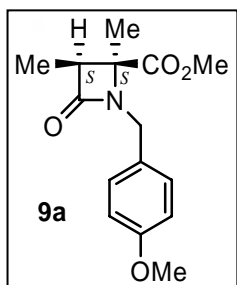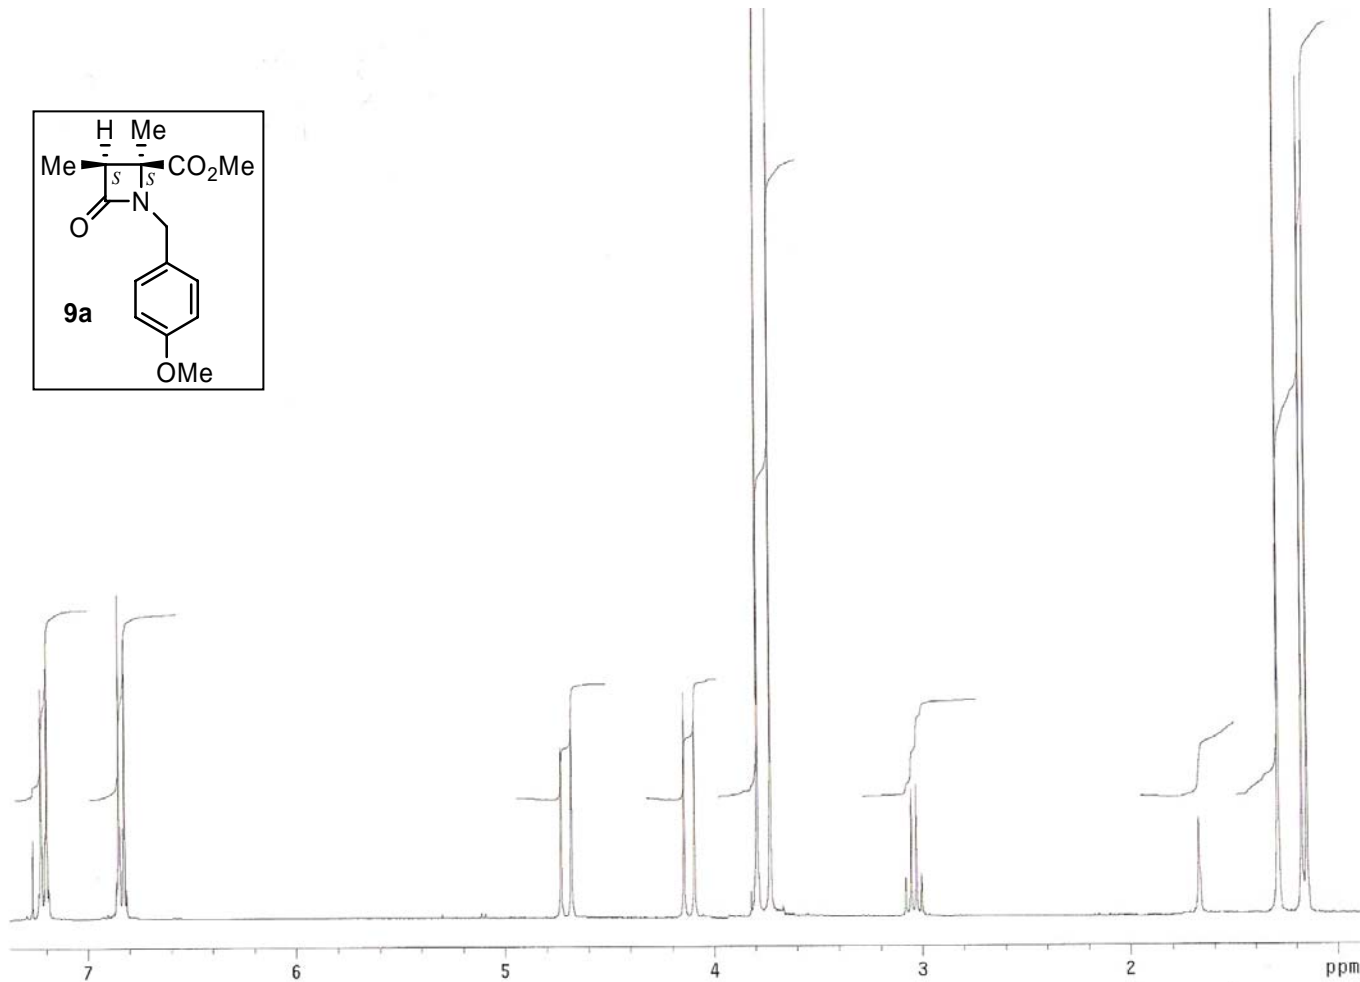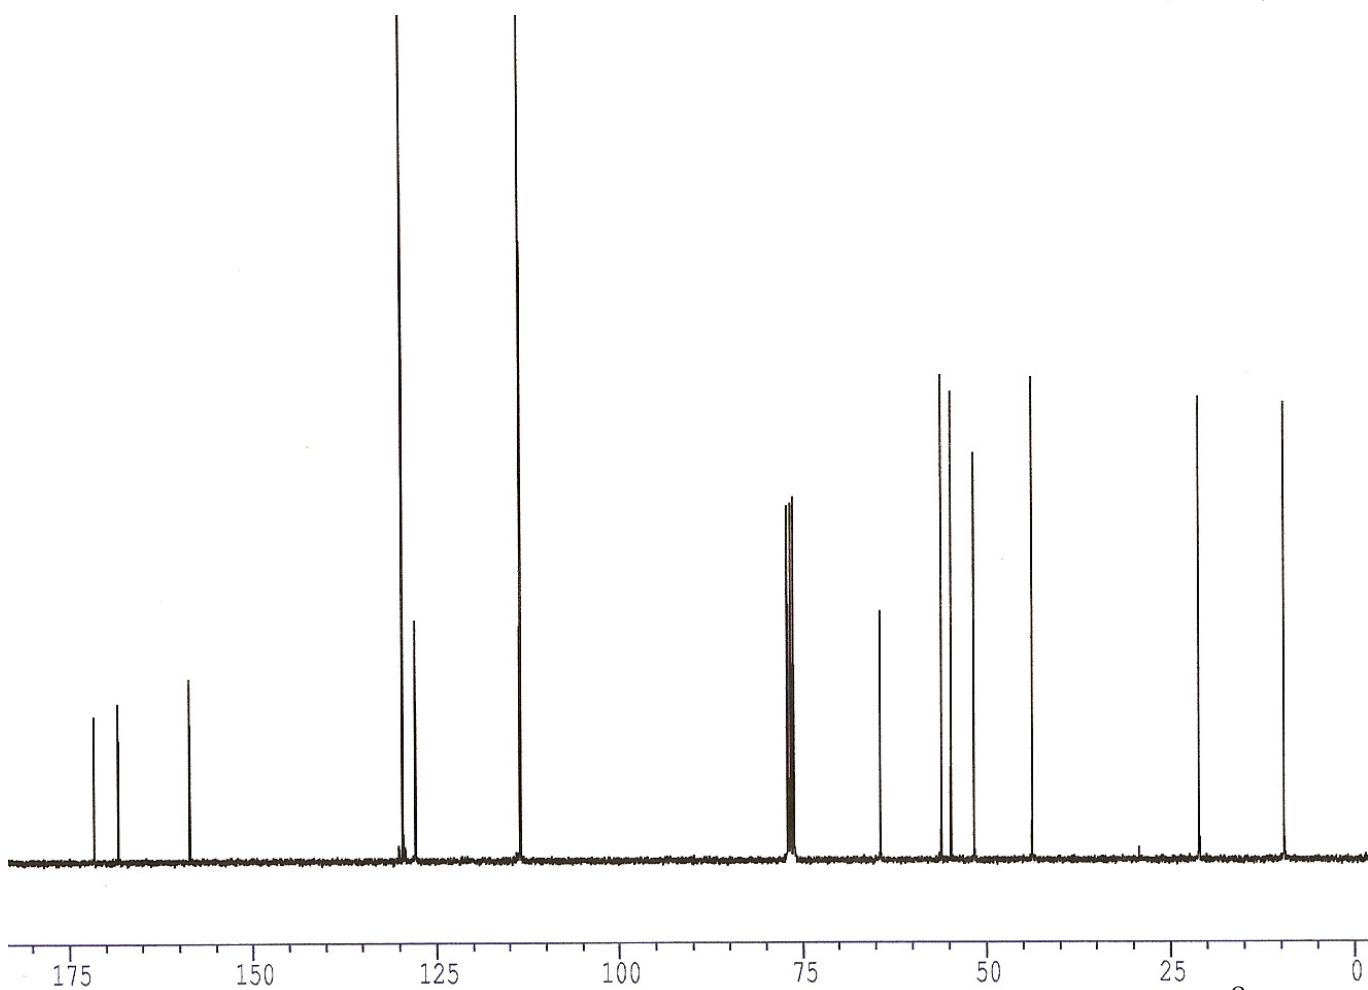



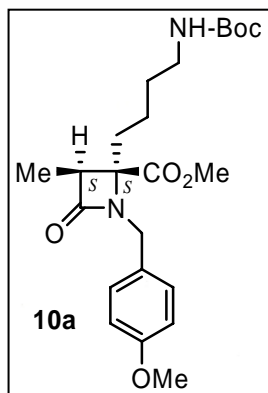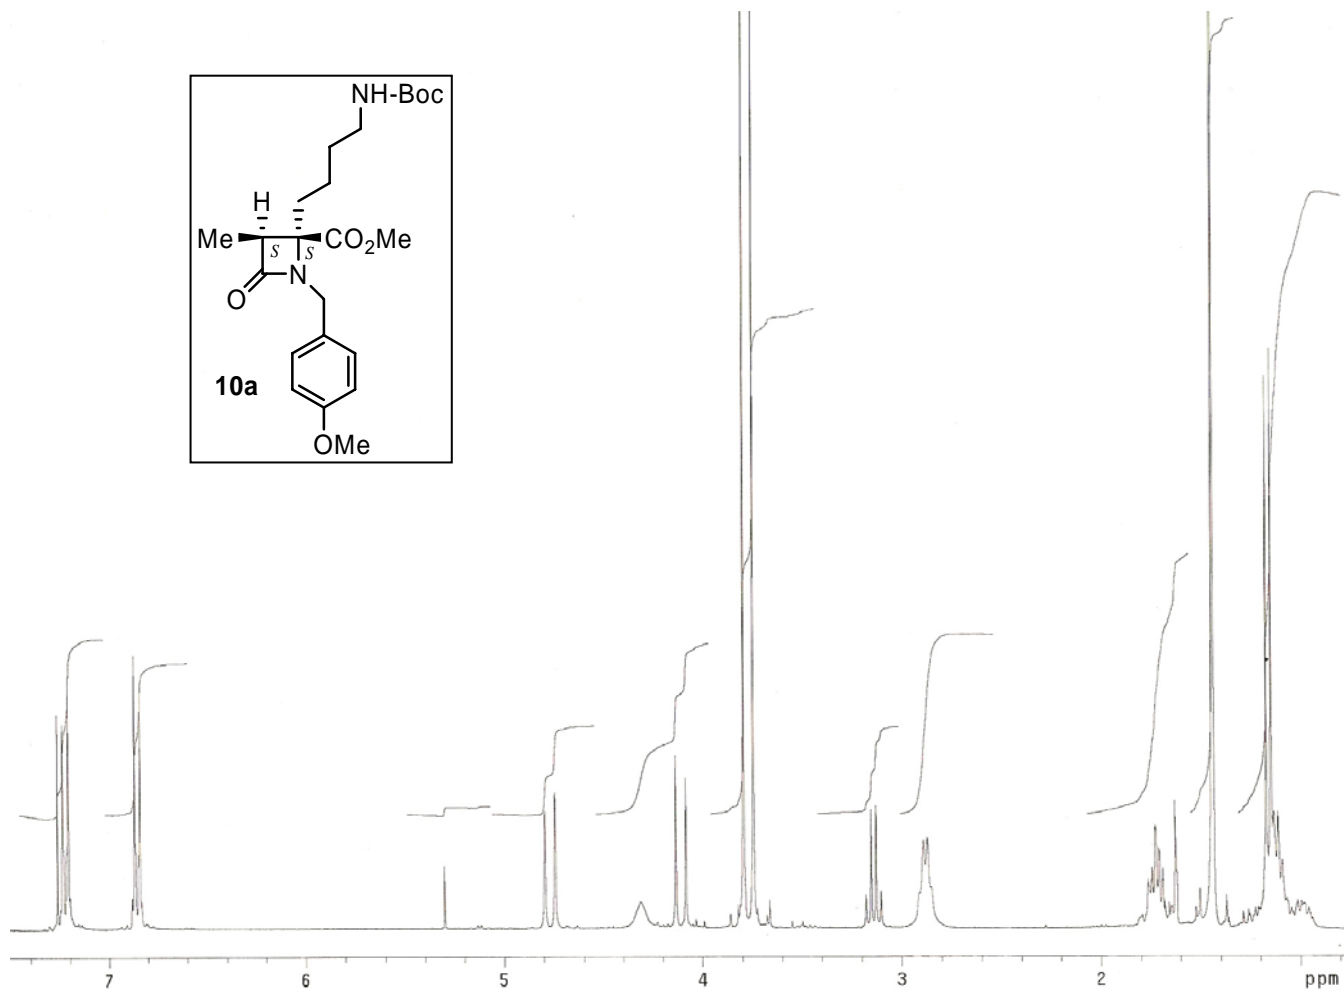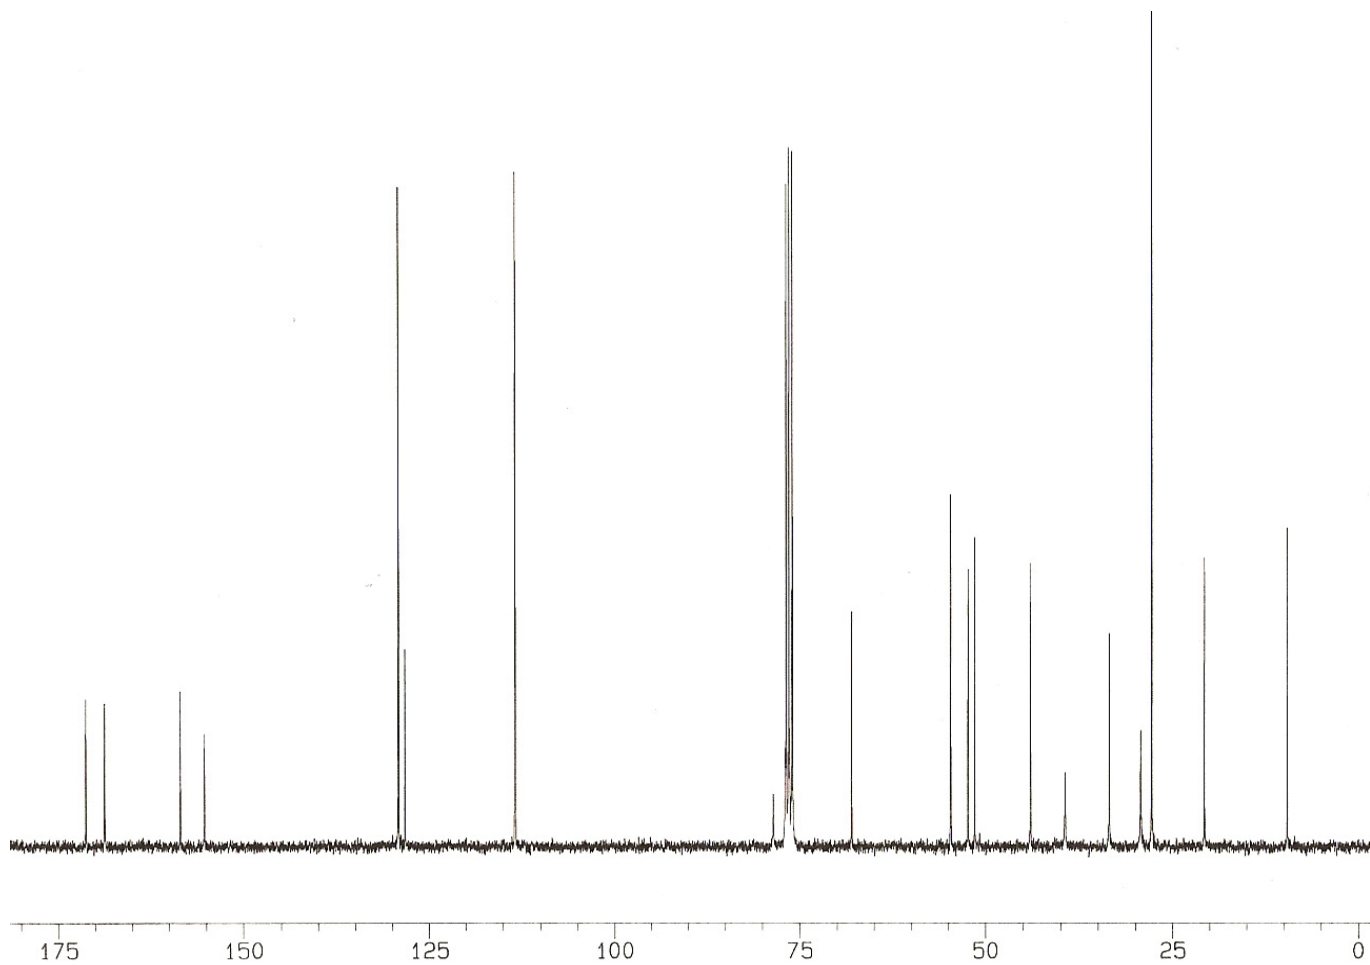

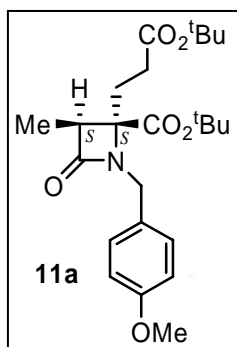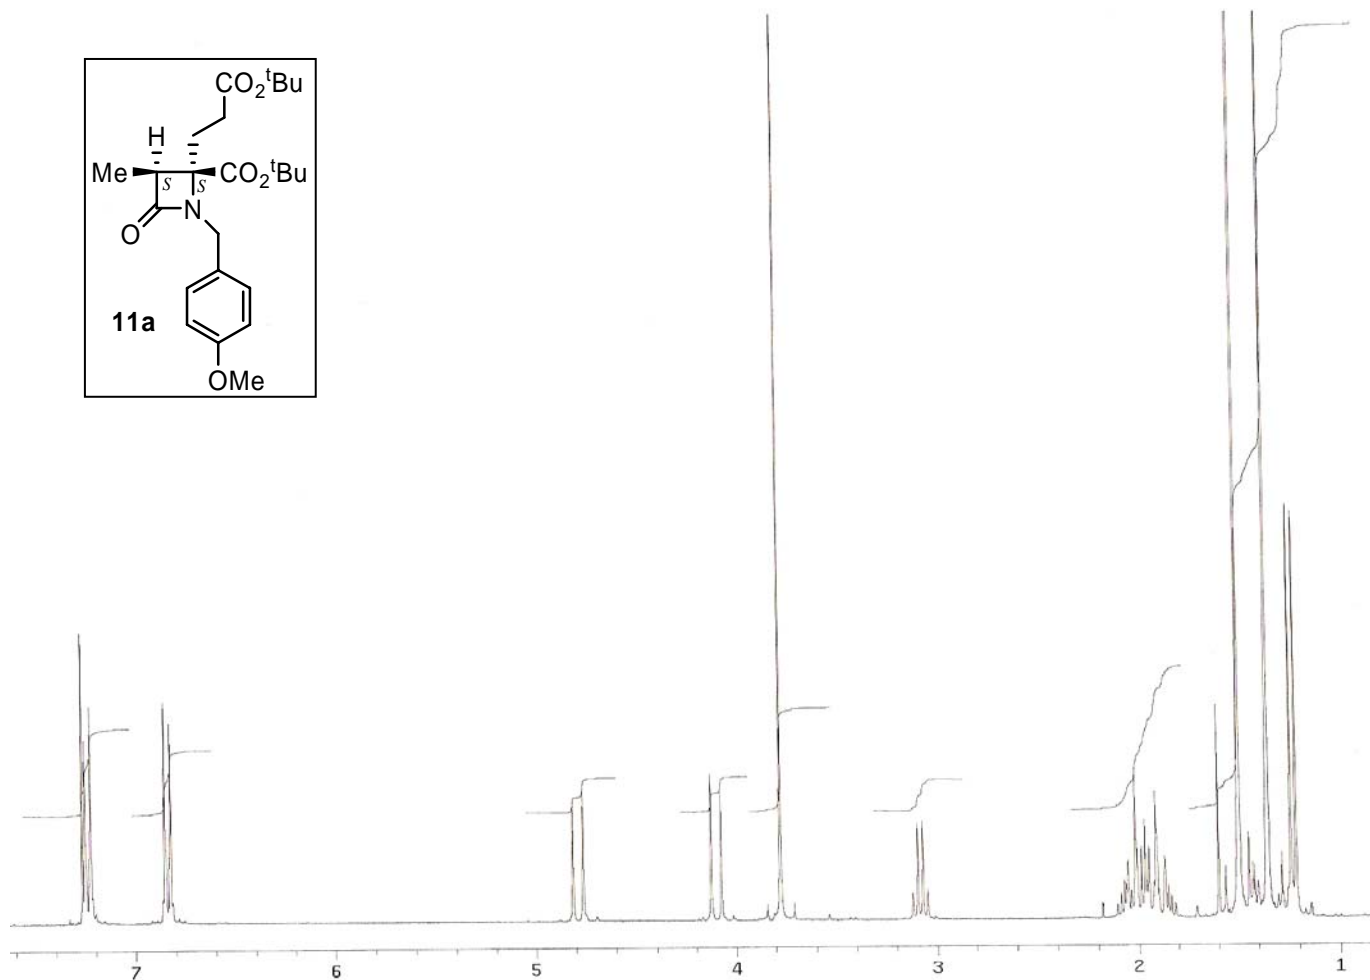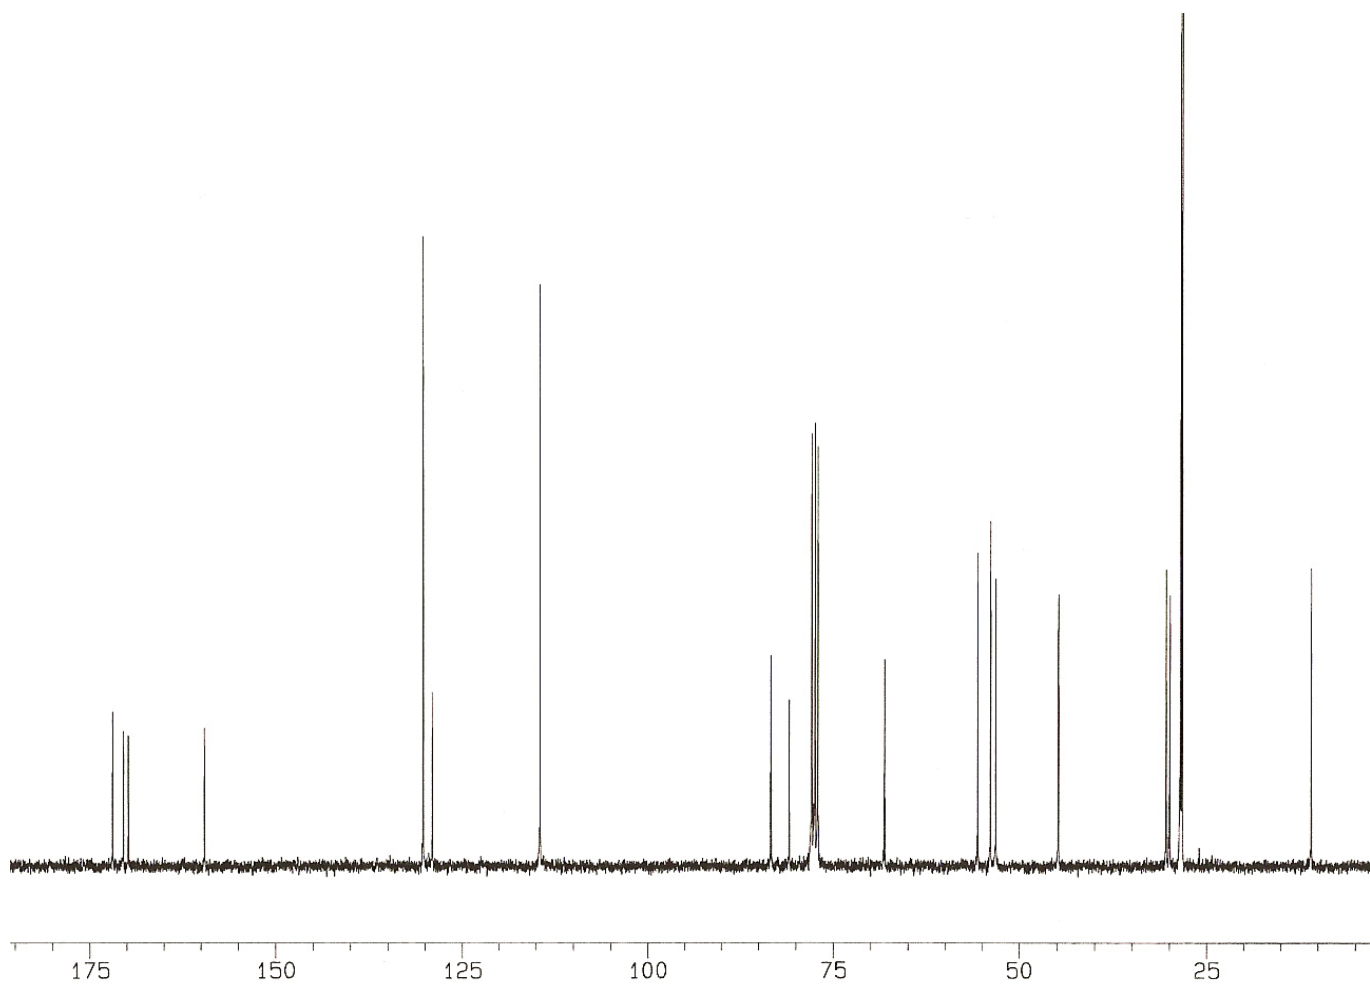

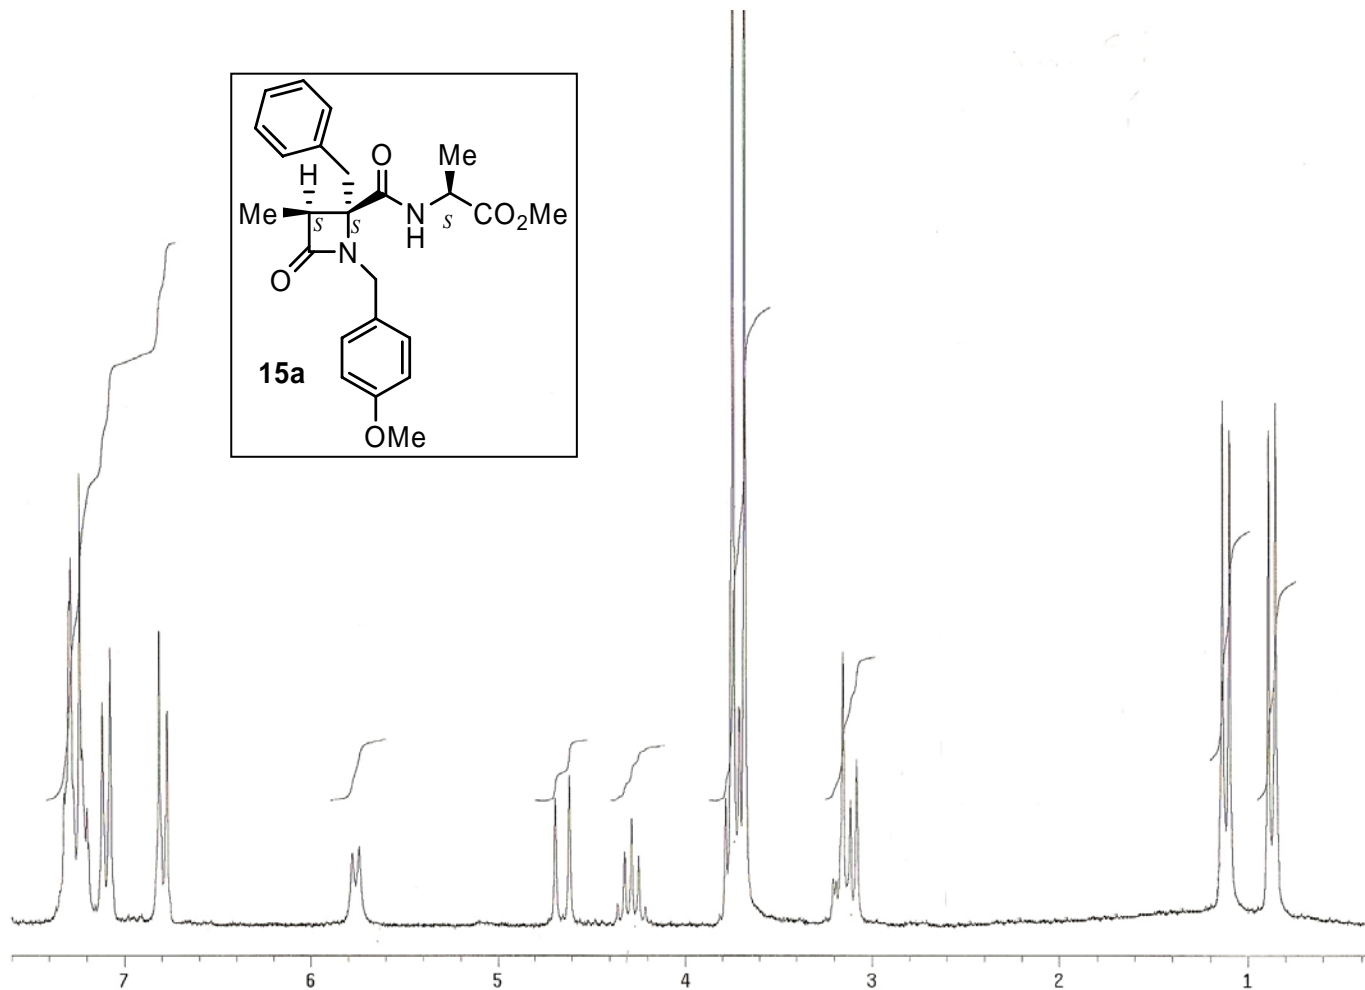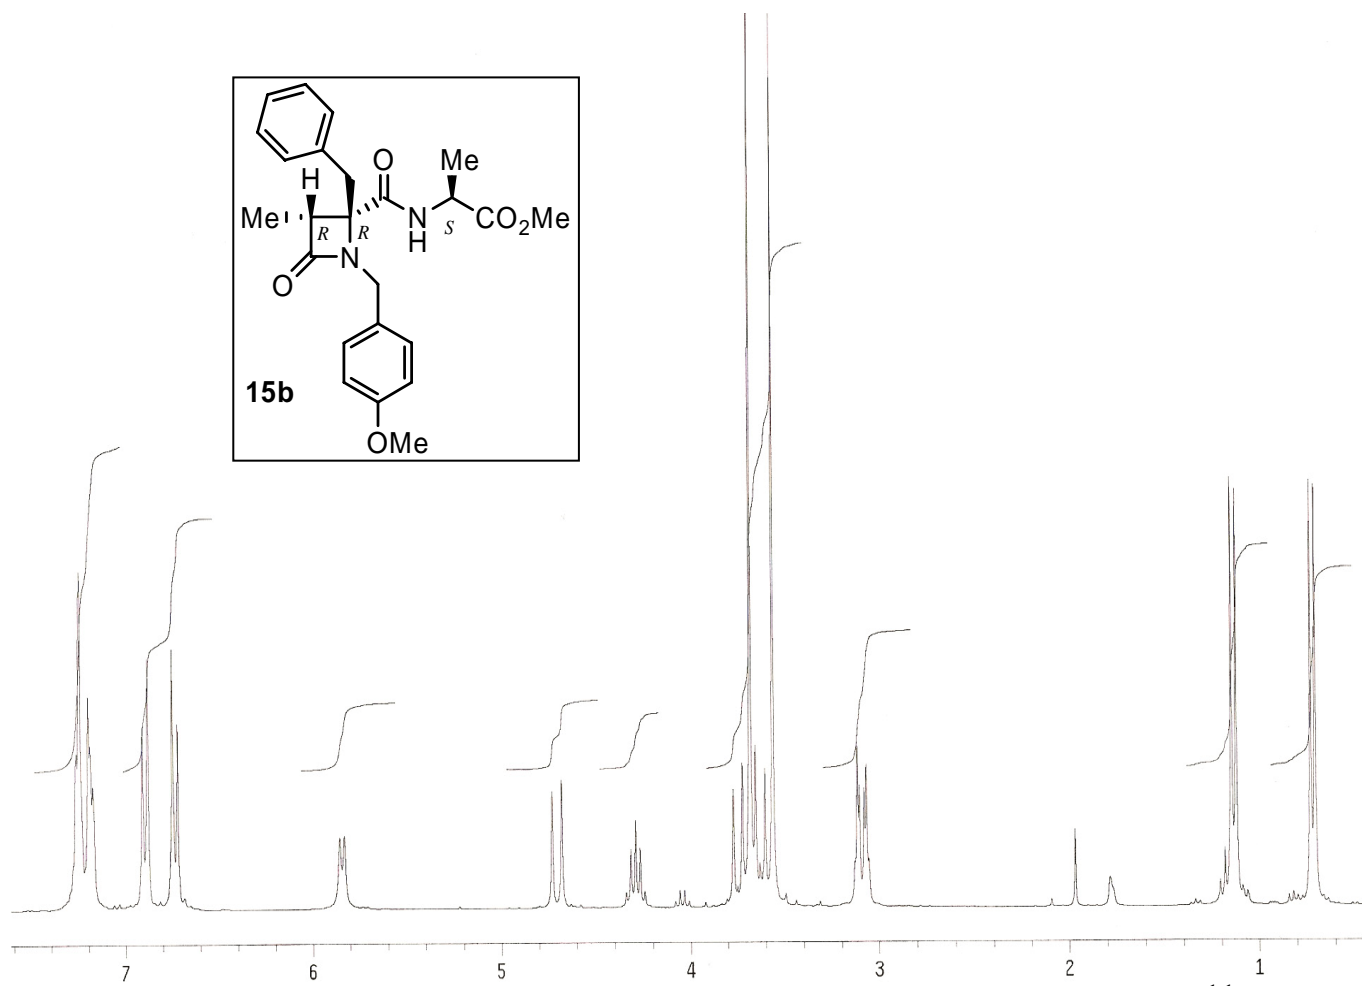

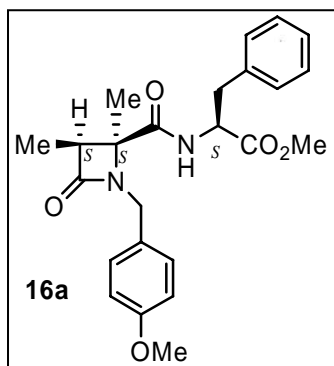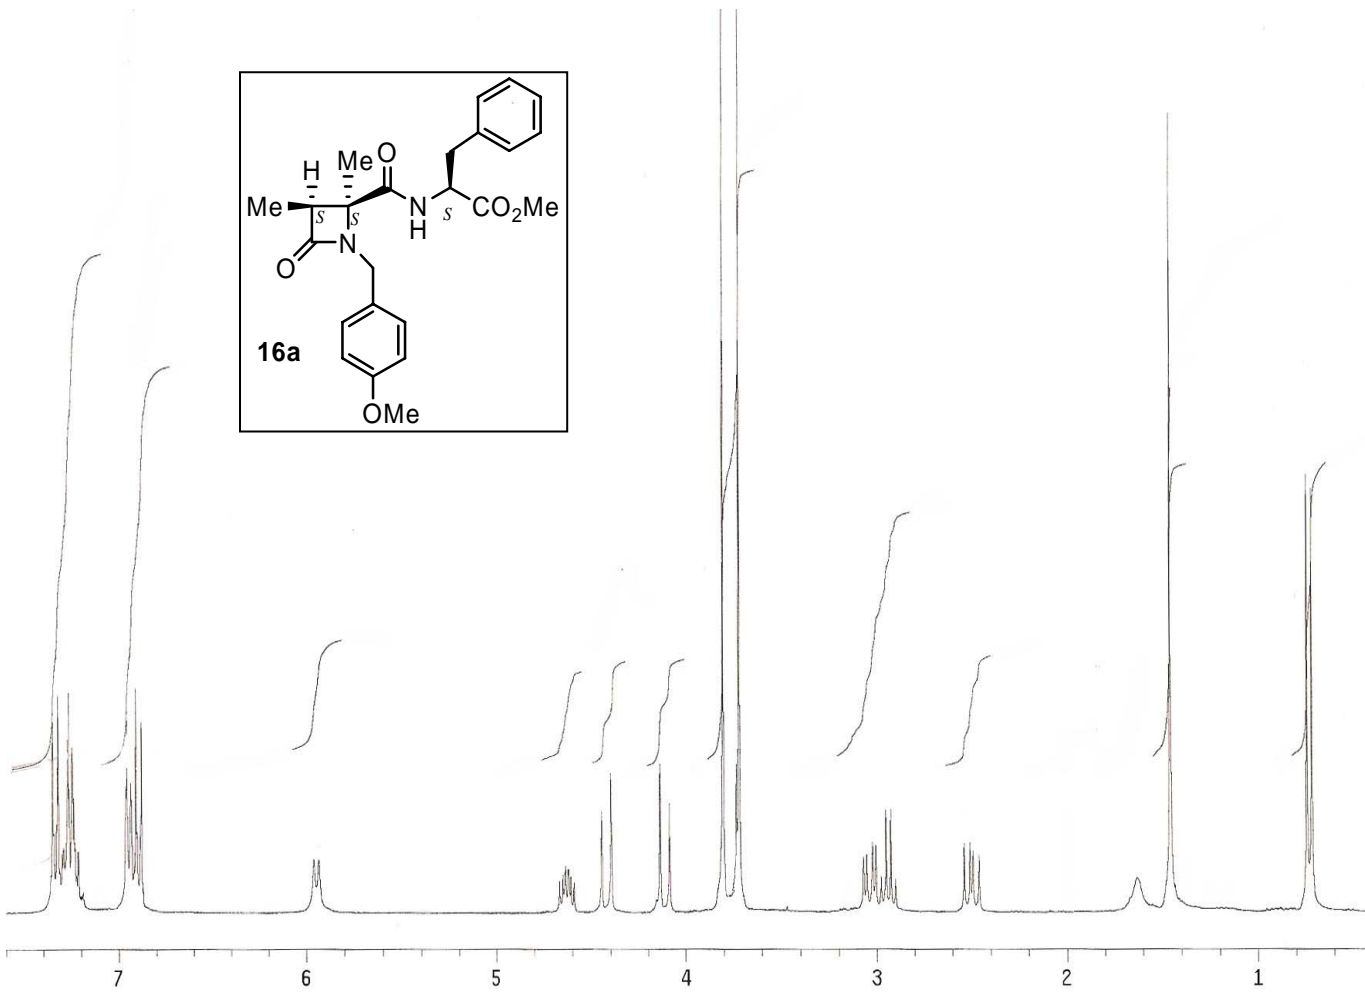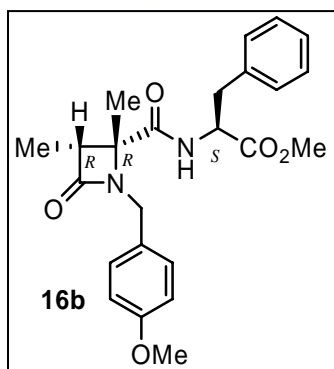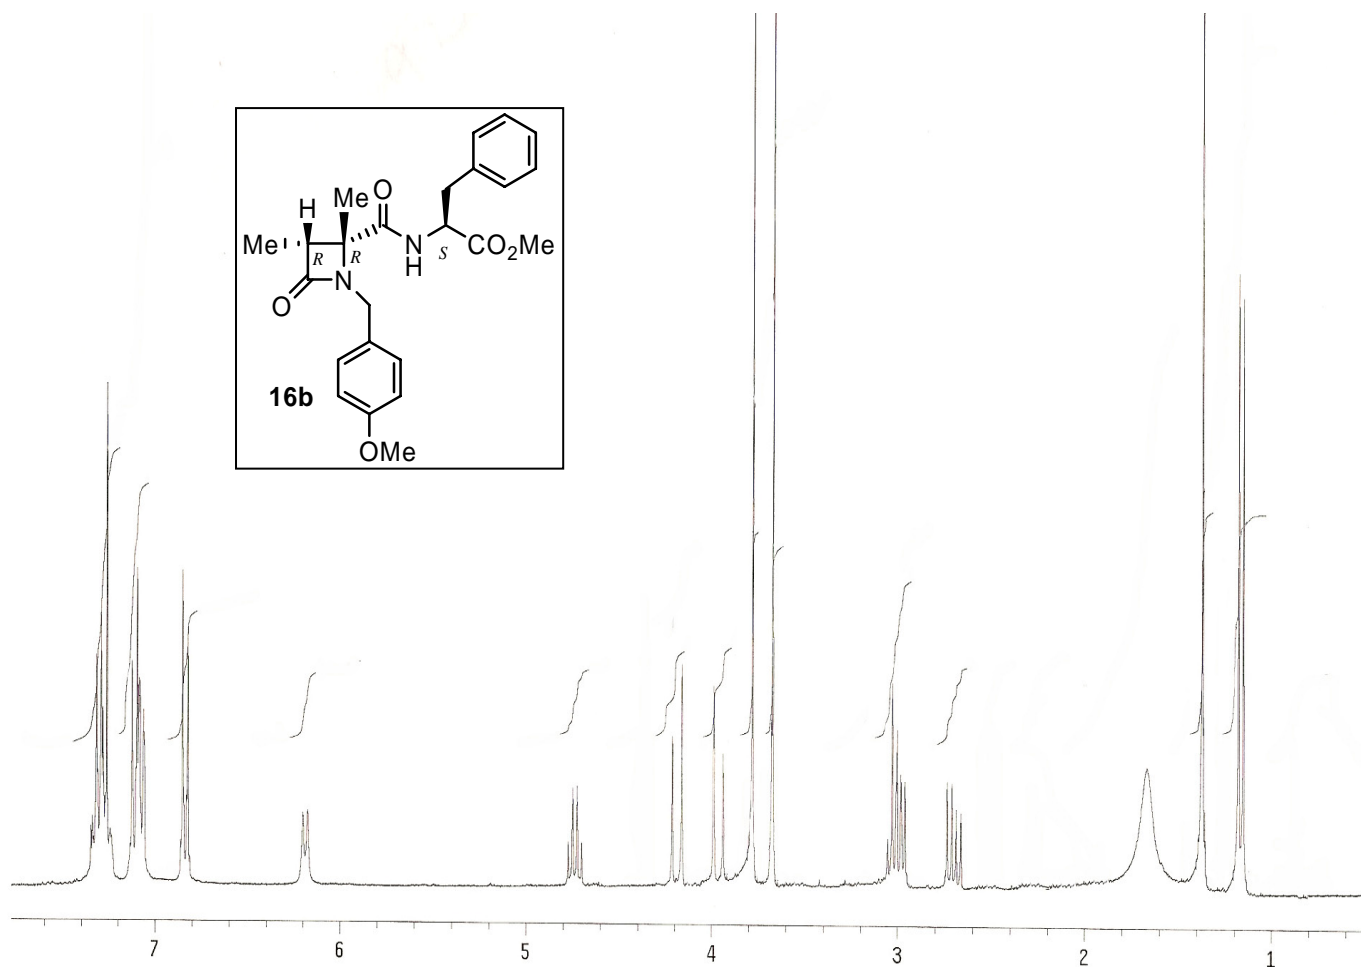

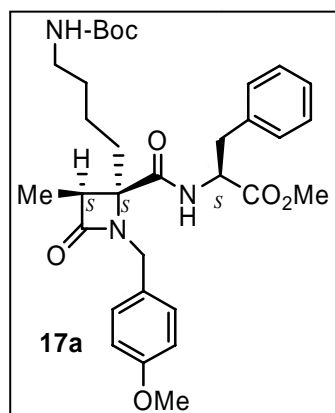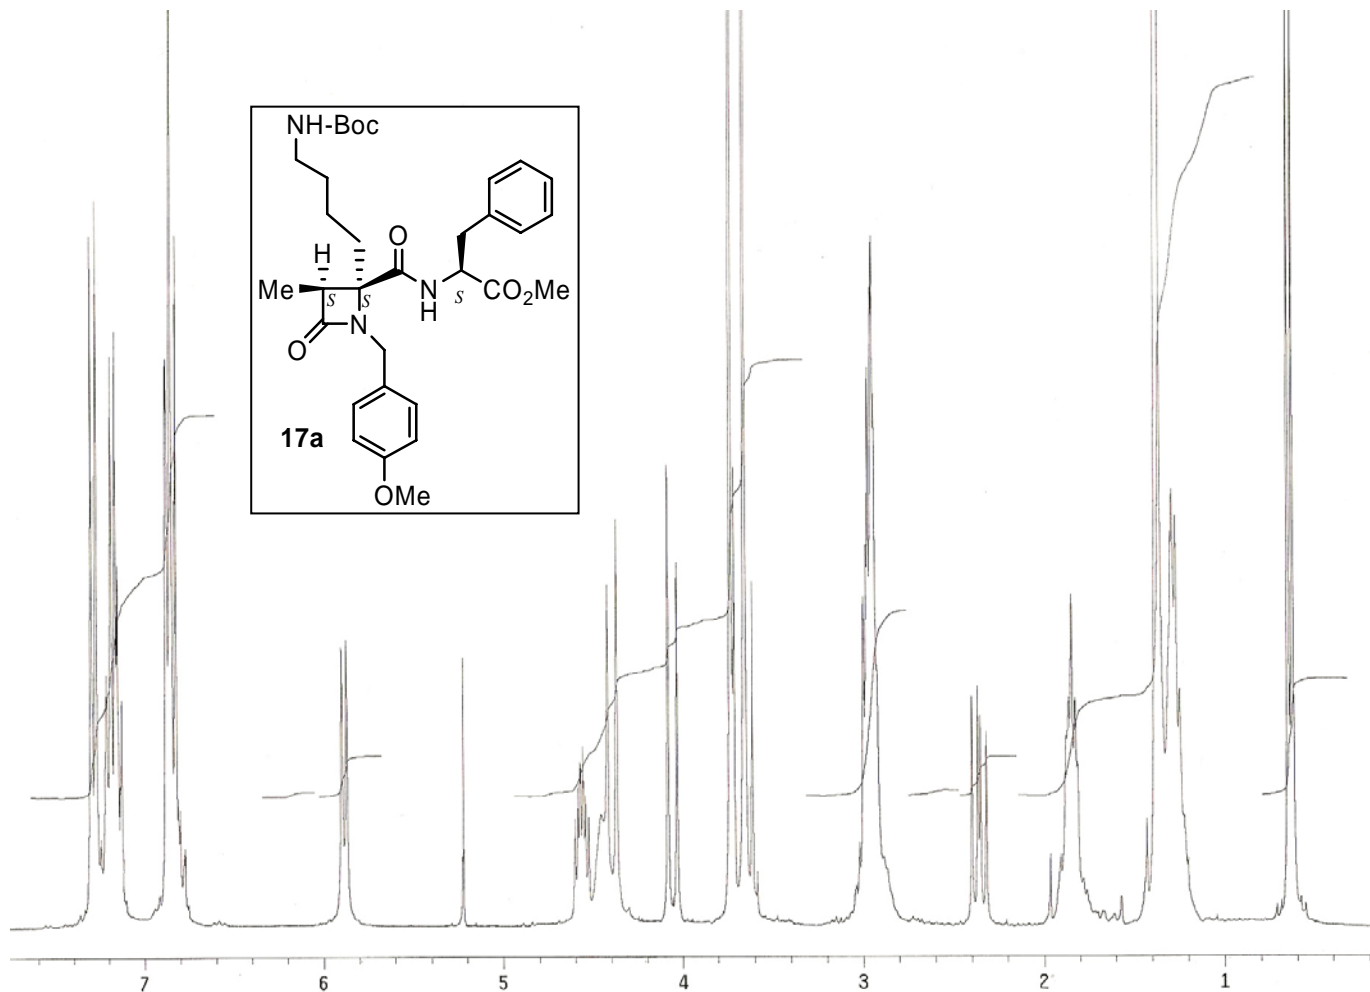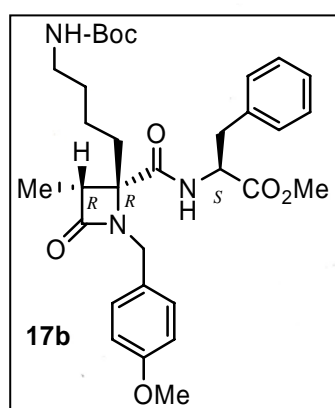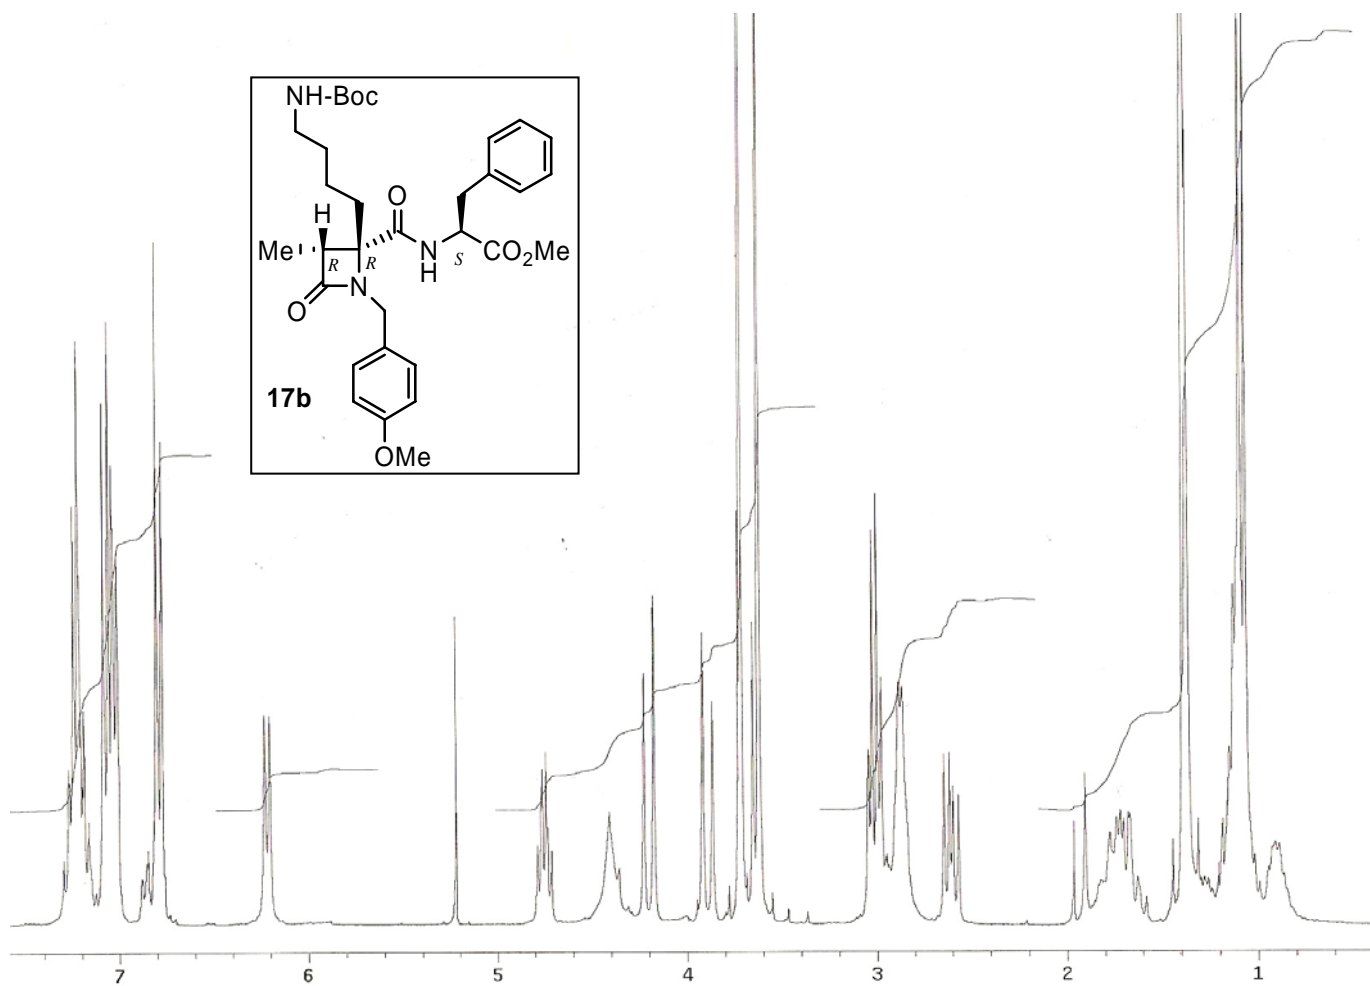

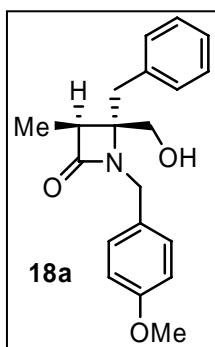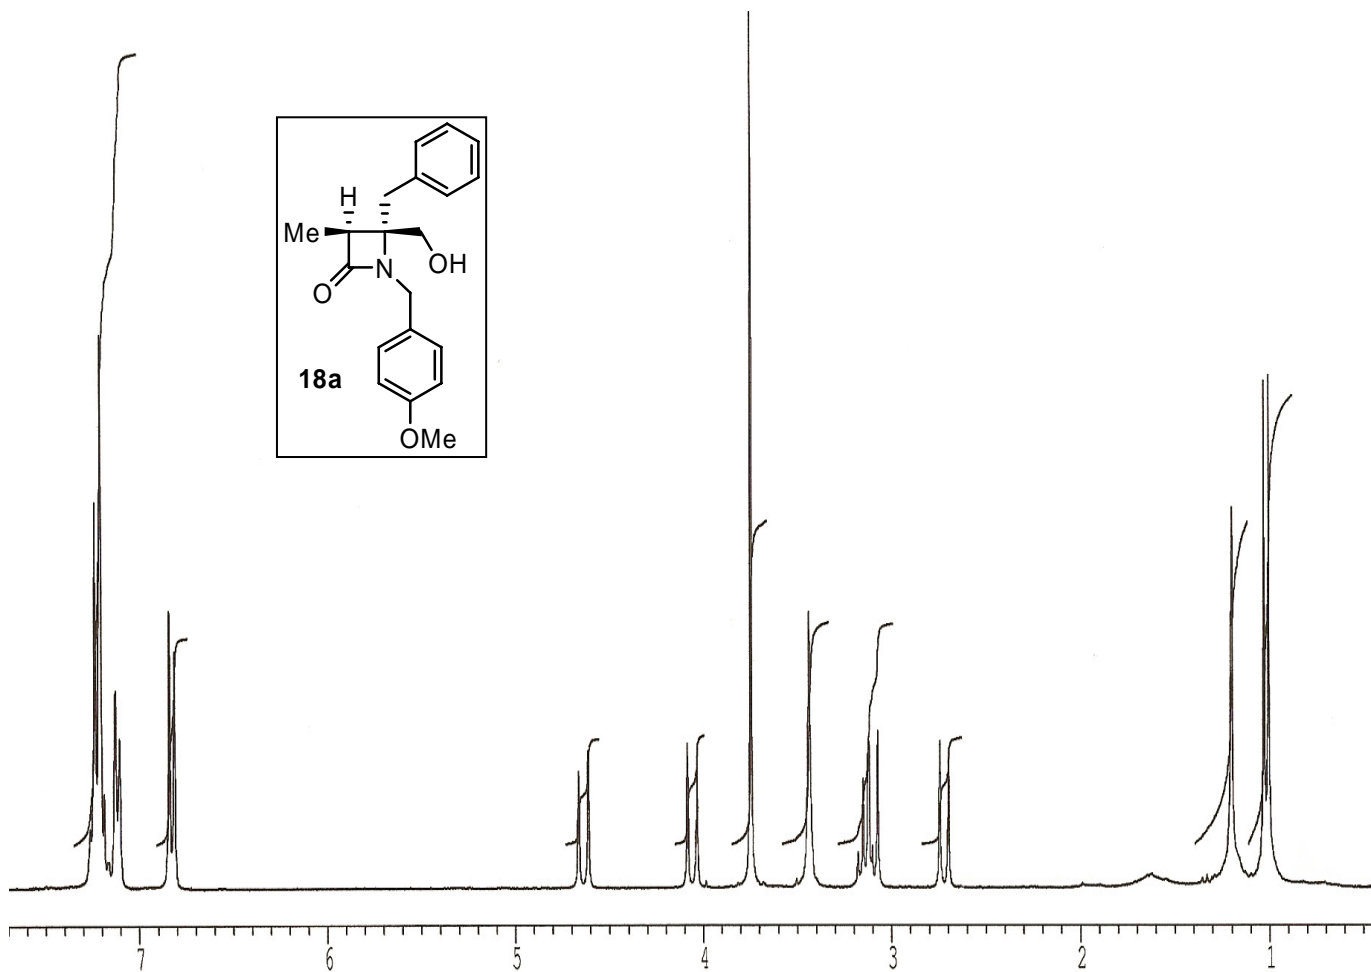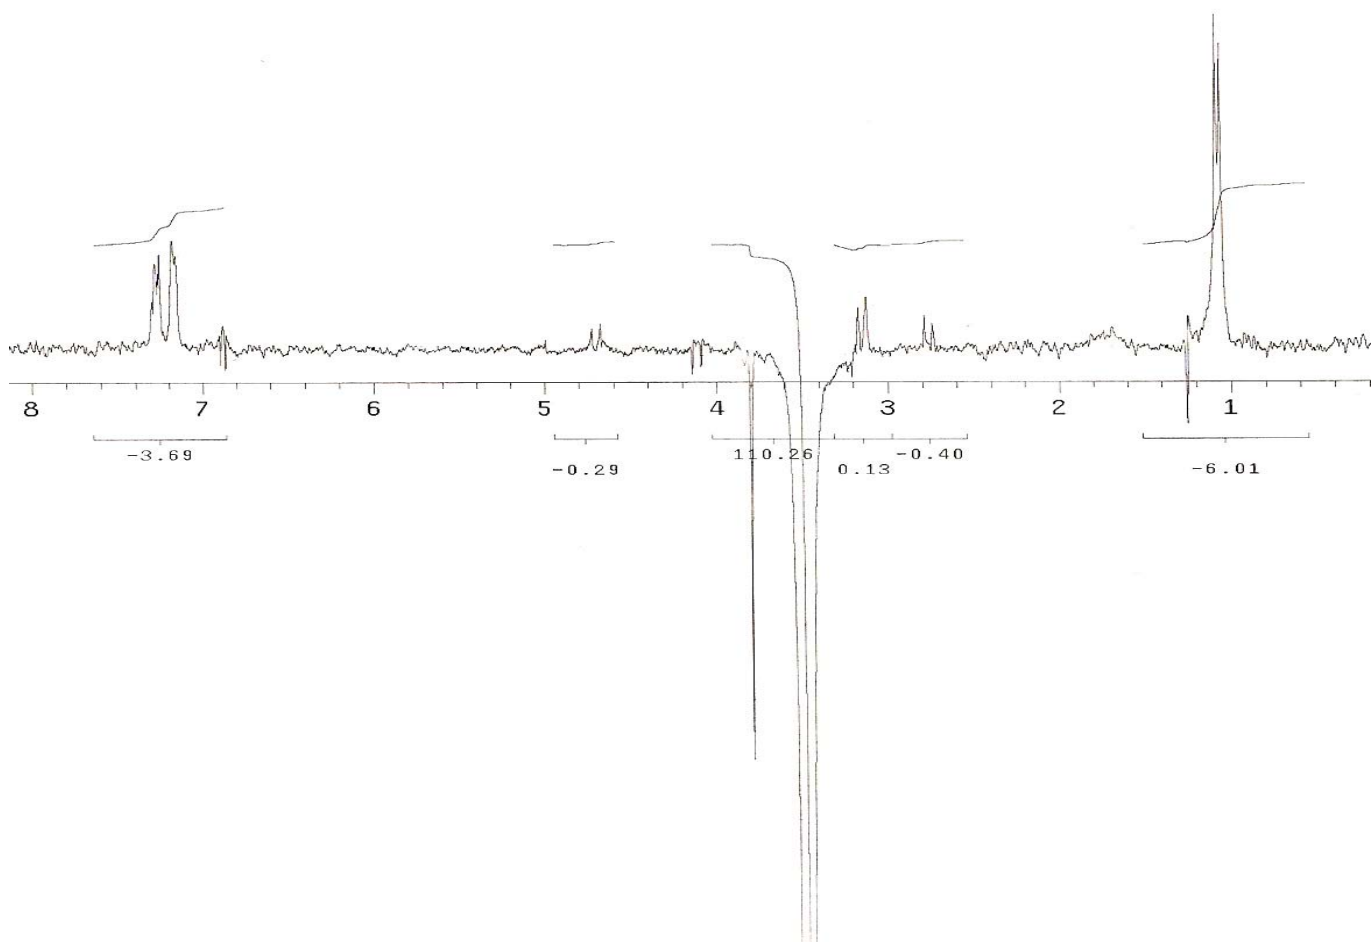

Supplement: Supplementary file 1 [file 4714786]
